# Supplementary material for: Confinement effects on the structure and reactivity of encapsulated buckybowls in cycloparaphenylene
Source: Royal Society of Chemistry journal article supplement (doi:10.1039/d4cc01662a), 2024-01-01
Supplement: d4cc01662a1.pdf [file d4cc01662a1.pdf]

ESI for

**Confinement Effects on the Structure and Reactivity of Encapsulated  
Buckybowl in Cycloparaphenylene**

Shan Li<sup>a</sup>, Zi-Yang Qiu<sup>a</sup>, Jing-Shuang Dang<sup>\*a</sup>, Hidehiro Sakurai<sup>b</sup>

*a. Key Laboratory for Macromolecular Science of Shaanxi Province, School of Chemistry and Chemical Engineering, Shaanxi Normal University, Xi'an 710119, China*

*b. Department of Applied Chemistry, Graduate School of Engineering, Osaka University, Osaka 565-0871, Japan.*

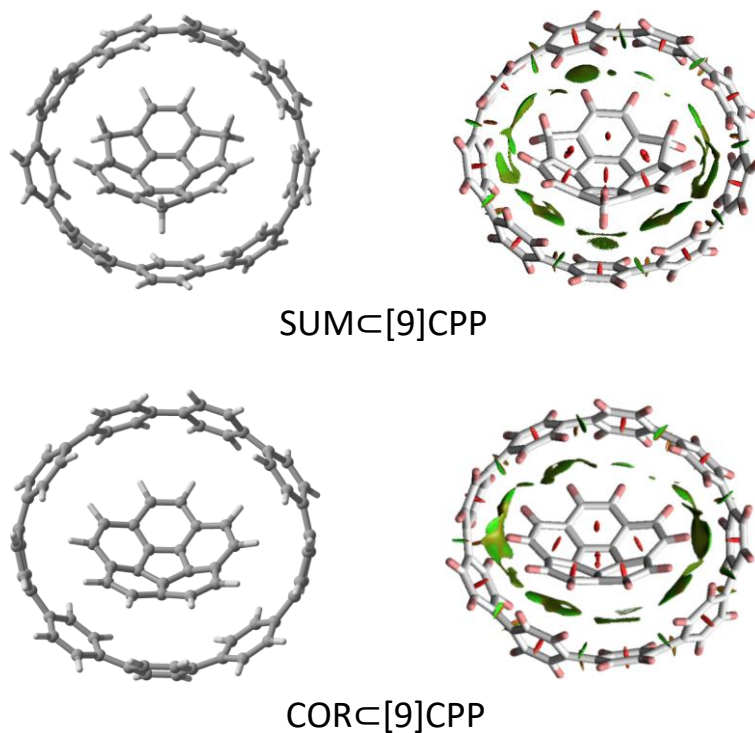

Fig. S1. Structures and non-covalent interaction diagrams of SUMC[9]CPP and CORC[9]CPP.

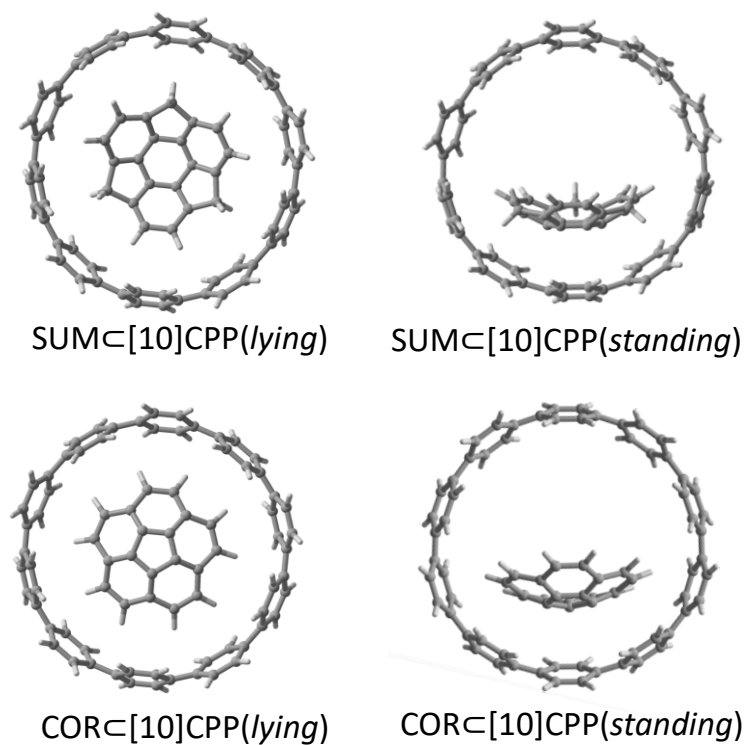

Fig. S2. Structures of SUMC[10]CPP and CORC[10]CPP in *lying* and *standing* orientations.

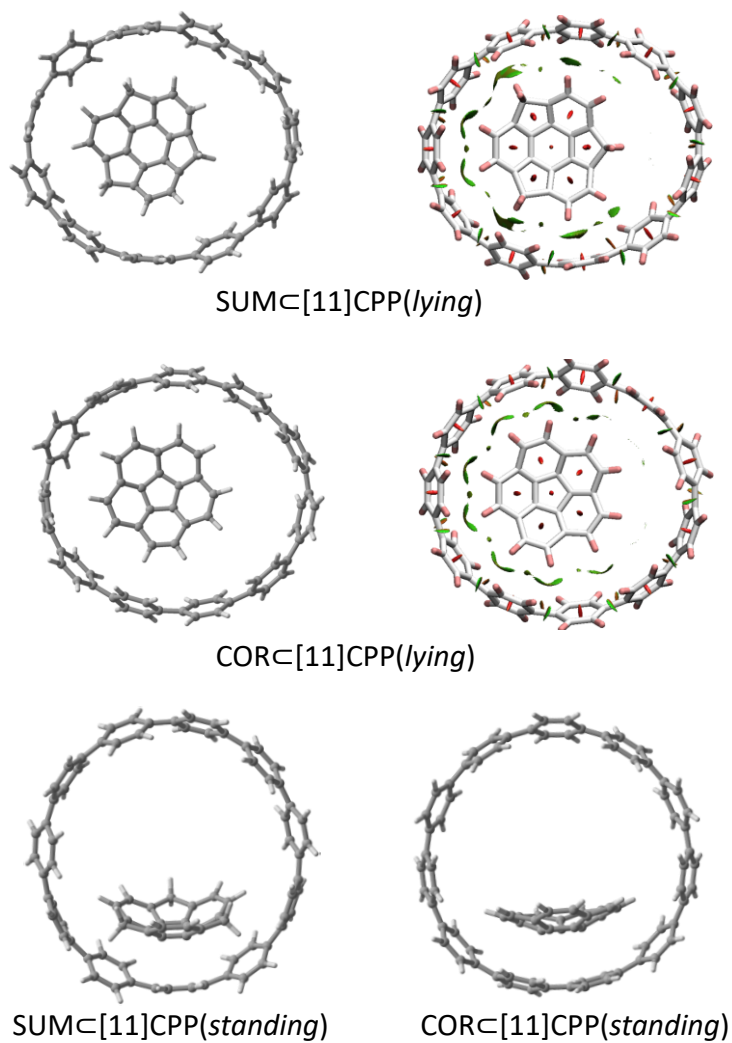

Fig. S3. Structures of SUMC[11]CPP and CORC[11]CPP in *lying* and *standing* orientations and the non-covalent interaction diagrams of complexes in a more stable lying orientation.

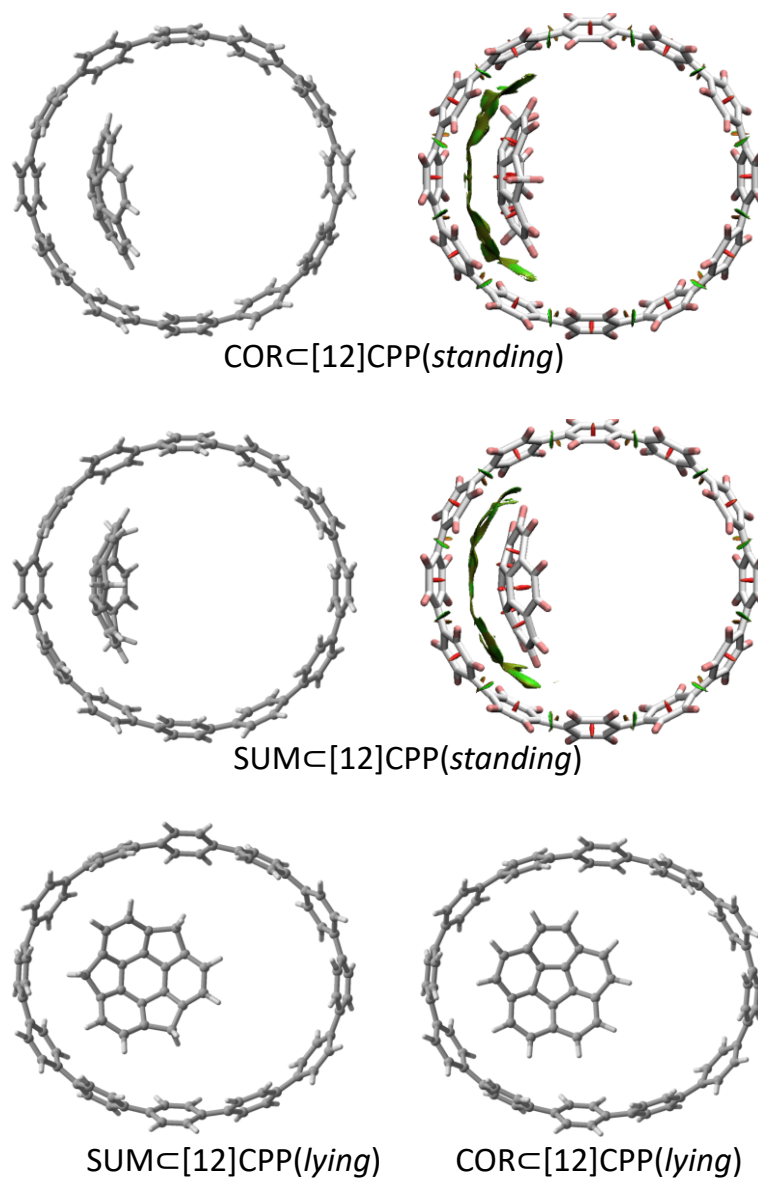

Fig. S4. Structures of SUMC[12]CPP and CORC[12]CPP in *lying* and *standing* orientations and the non-covalent interaction diagrams of complexes in a more stable *standing* orientation.

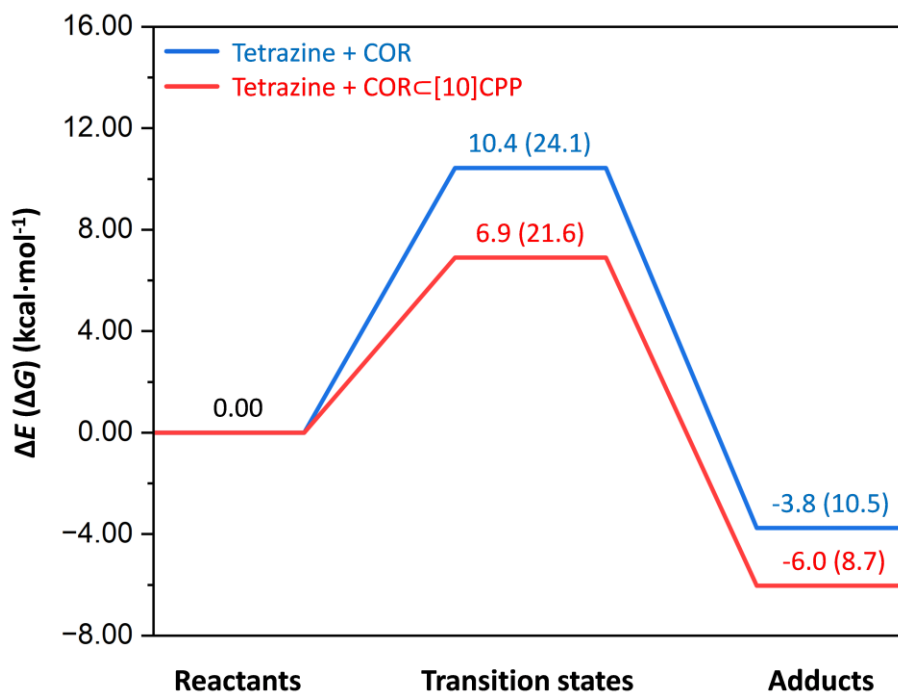

Fig. S5. Energy profiles of the DA reactions Tetrazine + COR and Tetrazine + COR<[10]CPP.

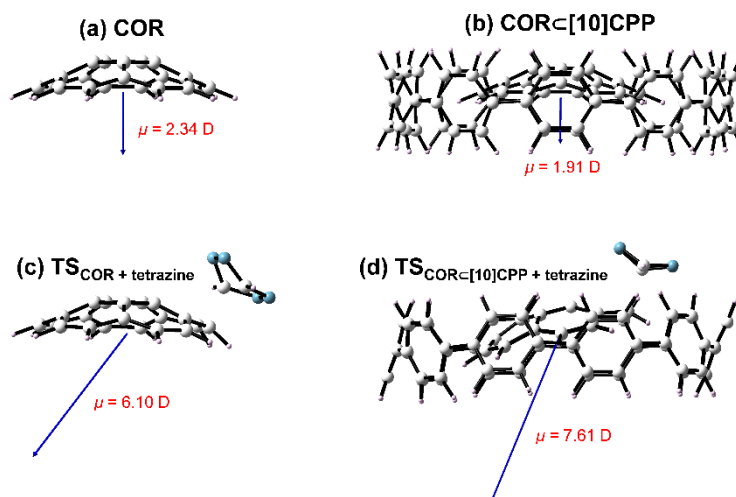

Fig. S6. Calculated dipole moments of (a) corannulene, (b) COR<[10]CPP, (c) TS of the DA reaction COR + tetrazine, and (d) TS of the DA reaction COR<[10]CPP + tetrazine.

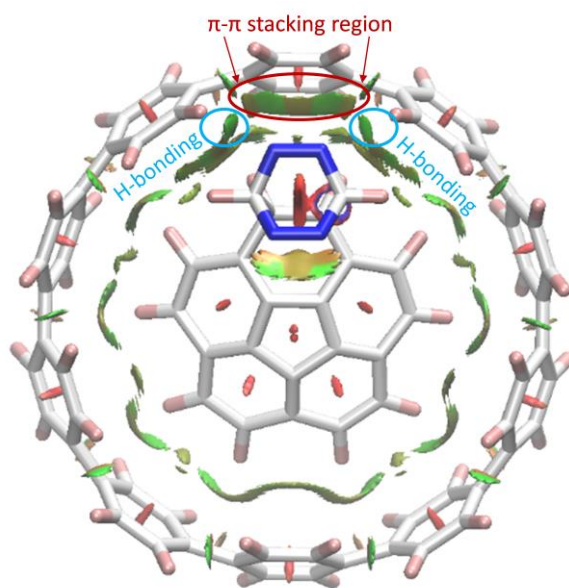

Fig. S7. non-covalent interaction diagrams of the transition state configuration of the DA reaction between CORC[10]CPP and tetrazine.

Table S1. Calculated binding energies of buckybowl⊂[n]CPP.

| Buckybowl   | Orientation     | $\Delta E_b^a$ ( $\Delta G_b^b$ ) (kcal·mol <sup>-1</sup> ) |               |               |              |
|-------------|-----------------|-------------------------------------------------------------|---------------|---------------|--------------|
|             |                 | [9]CPP                                                      | [10]CPP       | [11]CPP       | [12]CPP      |
| Sumanene    | <i>lying</i>    | -28.4 (-14.7)                                               | -30.0 (-15.3) | -24.1 (-11.4) | -18.9 (-6.6) |
|             | <i>standing</i> |                                                             | -25.0 (-10.8) | -23.9 (-9.9)  | -22.6 (-8.7) |
| Corannulene | <i>lying</i>    | -26.0 (-11.6)                                               | -31.7 (-16.6) | -24.0 (-11.2) | -19.2 (-6.7) |
|             | <i>standing</i> |                                                             | -24.3 (-10.7) | -23.3 (-9.3)  | -22.0 (-8.9) |

a.  $\Delta E_b$  represents the change of zero-point energy (ZPE)-corrected electronic energies.

b.  $\Delta G_b$  represents the change of Gibbs free energies at room temperature.

Table S2. Calculated distortion energies of [n]CPP ( $E_{d-CPP}$ ) in buckybowl⊂[n]CPP

| Buckybowl   | Orientation     | $E_{d-CPP}$ (kcal·mol <sup>-1</sup> ) |         |         |         |
|-------------|-----------------|---------------------------------------|---------|---------|---------|
|             |                 | [9]CPP                                | [10]CPP | [11]CPP | [12]CPP |
| Sumanene    | <i>lying</i>    | 1.4                                   | 0.4     | 1.2     | 1.5     |
|             | <i>standing</i> |                                       | 0.7     | 0.5     | 0.6     |
| Corannulene | <i>lying</i>    | 4.2                                   | 0.1     | 0.9     | 2.2     |
|             | <i>standing</i> |                                       | 0.5     | 0.8     | 0.6     |

## S1. Computational Details.

Density functional theory (DFT) calculations were carried out by applying the Gaussian 16 program.<sup>S1</sup> Geometrical optimizations of all relevant structures were performed using the B97D3 functional in conjunction with the basis sets of 6-311G(d,p). Frequency analyses were performed at the same level of theory to confirm the nature of stationary points. The zero-point energy (ZPE)-corrected energies as well as Gibbs free energies were used to estimate the binding strength between host and guest molecules and the free energy barriers were used to evaluate the reactivity kinetically. The implicit solvent effect was considered using the polarizable continuum model (PCM), with dichloromethane and toluene, as utilized in relevant experiments,<sup>S2-S3</sup> chosen as the solvents. To further examine the thermal stability of newly-designed host-guest compounds, ab initio molecular dynamics (AIMD) simulations were conducted using the CP2K 9.1 program.<sup>S4</sup> The Grimme's D3-corrected PBE functional was employed. The AIMD simulations under the NVT ensemble was set to a time step of 1 fs at a fluctuant temperature around 300 K with a CSVN thermostat method.

### References:

S1. Gaussian 16, Revision A.03, Frisch, M. J.; Trucks, G. W.; Schlegel, H. B.; Scuseria, G. E.; Robb, M. A.; Cheeseman, J. R.; Scalmani, G.; Barone, V.; Petersson, G. A.; Nakatsuji, H.; Li, X.; Caricato, M.; Marenich, A. V.; Bloino, J.; Janesko, B. G.; Gomperts, R.; Mennucci, B.; Hratchian, H. P.; Ortiz, J. V.; Izmaylov, A. F.; Sonnenberg, J. L.; Williams-Young, D.; Ding, F.; Lipparini, F.;



Egidi, F.; Goings, J.; Peng, B.; Petrone, A.; Henderson, T.; Ranasinghe, D.; Zakrzewski, V. G.; Gao, J.; Rega, N.; Zheng, G.; Liang, W.; Hada, M.; Ehara, M.; Toyota, K.; Fukuda, R.; Hasegawa, J.; Ishida, M.; Nakajima, T.; Honda, Y.; Kitao, O.; Nakai, H.; Vreven, T.; Throssell, K.; Montgomery, J. A., Jr.; Peralta, J. E.; Ogliaro, F.; Bearpark, M. J.; Heyd, J. J.; Brothers, E. N.; Kudin, K. N.; Staroverov, V. N.; Keith, T. A.; Kobayashi, R.; Normand, J.; Raghavachari, K.; Rendell, A. P.; Burant, J. C.; Iyengar, S. S.; Tomasi, J.; Cossi, M.; Millam, J. M.; Klene, M.; Adamo, C.; Cammi, R.; Ochterski, J. W.; Martin, R. L.; Morokuma, K.; Farkas, O.; Foresman, J. B.; Fox, D. J. Gaussian, Inc., Wallingford CT, 2016.

S2. Matsuno, T.; Fujita, M.; Fukunaga, K.; Sato, S.; Isobe, H., Concyclic CH- $\pi$  Arrays for Single-Axis Rotations of a Bowl in a Tube. *Nat. Commun.* **2018**, *9*, 3779.

S3. Iwamoto, T.; Watanabe, Y.; Sadahiro, T.; Haino, T.; Yamago, S., *Angew. Chem. Int. Ed.* **2011**, *50*, 8342.

S4. CP2K Developer Group. CP2K home page.<http://www.cp2k.org/>.

## S2. Cartesian coordinates of all relevant structures and the imaginary frequency of all transition states (TSs).

### Corannulene (COR)

|   |       |       |       |   |       |       |       |   |      |       |       |
|---|-------|-------|-------|---|-------|-------|-------|---|------|-------|-------|
| C | 0.27  | -0.89 | 3.05  | C | -0.10 | 2.46  | -0.65 | H | 0.67 | -1.48 | 3.88  |
| C | 0.27  | 0.50  | 3.16  | C | -0.67 | 1.22  | -0.36 | H | 0.66 | 0.95  | 4.07  |
| C | -0.11 | 1.34  | 2.05  | C | -0.67 | 0.68  | 0.96  | H | 0.66 | 3.32  | 2.60  |
| C | 0.27  | 2.72  | 1.79  | C | -0.67 | -0.75 | 0.85  | H | 0.67 | 4.25  | 0.35  |
| C | 0.27  | 3.25  | 0.50  | C | -0.66 | -1.08 | -0.53 | H | 0.69 | -3.60 | 2.07  |
| C | -0.10 | -1.57 | 1.82  | C | -0.08 | -2.26 | -1.01 | H | 0.70 | -4.18 | -0.29 |
| C | 0.29  | -2.88 | 1.36  | C | 0.31  | -2.22 | -2.41 | H | 0.70 | 1.74  | -3.94 |
| C | 0.30  | -3.21 | 0.01  | C | 0.31  | -1.03 | -3.14 | H | 0.69 | 3.60  | -2.36 |
| C | 0.30  | 1.57  | -2.94 | C | -0.08 | 0.23  | -2.55 | H | 0.72 | -3.11 | -2.87 |
| C | 0.29  | 2.63  | -2.04 | C | -0.66 | 0.13  | -1.28 | H | 0.72 | -1.04 | -4.15 |

### Sumanene (SUM)

|   |      |       |       |   |      |       |       |   |      |       |       |
|---|------|-------|-------|---|------|-------|-------|---|------|-------|-------|
| C | 4.86 | -1.43 | 3.08  | C | 3.64 | -1.31 | 0.58  | H | 4.04 | 2.41  | -3.39 |
| C | 4.37 | -0.20 | 2.64  | C | 4.24 | -2.53 | 0.95  | H | 5.72 | 2.03  | -2.99 |
| C | 3.70 | -0.18 | 1.40  | C | 4.79 | -2.59 | 2.24  | H | 5.37 | -0.66 | -4.26 |
| C | 3.75 | 1.13  | 0.81  | C | 4.76 | -2.08 | -2.74 | H | 5.31 | -3.49 | 2.57  |
| C | 3.74 | 1.27  | -0.57 | C | 4.22 | -2.28 | -1.46 | H | 5.27 | -2.89 | -3.26 |
| C | 4.44 | 2.31  | -1.22 | C | 4.46 | -3.34 | -0.35 | H | 5.47 | -3.75 | -0.40 |
| C | 4.68 | 1.86  | -2.69 | C | 4.71 | 1.28  | 2.99  | H | 3.76 | -4.18 | -0.44 |
| C | 4.82 | -0.77 | -3.33 | C | 4.46 | 2.02  | 1.65  | H | 4.08 | 1.67  | 3.80  |
| C | 4.33 | 0.35  | -2.64 | C | 5.05 | 3.13  | 1.03  | H | 5.75 | 1.38  | 3.31  |
| C | 3.68 | 0.11  | -1.42 | C | 5.04 | 3.28  | -0.39 | H | 5.65 | 3.83  | 1.61  |
| C | 3.63 | -1.16 | -0.85 | H | 5.42 | -1.51 | 4.00  | H | 5.63 | 4.08  | -0.82 |

### [9]CPP

|   |       |       |       |   |       |       |       |   |       |       |       |
|---|-------|-------|-------|---|-------|-------|-------|---|-------|-------|-------|
| C | -8.94 | -5.51 | 3.16  | C | -8.46 | 2.33  | 6.08  | C | -7.97 | -1.61 | -5.80 |
| C | -8.98 | -6.02 | 1.86  | C | -8.92 | -1.83 | 5.51  | C | -6.78 | -2.14 | -5.26 |
| C | -9.20 | -5.42 | -1.06 | C | -8.63 | 0.98  | 6.38  | C | -7.93 | 2.65  | -5.65 |
| C | -9.12 | -3.63 | -5.05 | C | -8.98 | -3.05 | 4.85  | C | -8.04 | -0.16 | -6.08 |
| C | -9.22 | -4.96 | -2.37 | C | -7.79 | -4.87 | 3.65  | C | -6.91 | 0.59  | -6.48 |
| C | -9.11 | -2.44 | -5.77 | C | -6.62 | -4.95 | 2.86  | C | -7.74 | 3.95  | -4.95 |
| C | -9.18 | 0.56  | -5.66 | C | -7.87 | -5.90 | 0.99  | C | -6.51 | 4.21  | -4.32 |
| C | -8.82 | 4.80  | -4.62 | C | -6.66 | -5.45 | 1.56  | C | -6.86 | 1.97  | -6.27 |
| C | -9.12 | 1.93  | -5.45 | C | -8.06 | -4.98 | -3.18 | C | -7.54 | 5.83  | -2.81 |
| C | -8.72 | 5.72  | -3.57 | C | -8.01 | -5.91 | -0.48 | C | -6.41 | 5.13  | -3.28 |
| C | -8.66 | 6.19  | -0.61 | C | -6.91 | -6.12 | -1.35 | C | -7.32 | 6.42  | 1.41  |
| C | -8.16 | 5.90  | 3.75  | C | -7.98 | -4.06 | -4.33 | C | -7.52 | 6.37  | -1.43 |
| C | -8.56 | 6.21  | 0.78  | C | -6.78 | -3.33 | -4.54 | C | -6.34 | 6.79  | -0.80 |
| C | -8.12 | 5.02  | 4.84  | C | -6.94 | -5.67 | -2.66 | C | -7.13 | 5.92  | 2.79  |

|   |        |       |       |   |        |       |       |   |       |       |       |
|---|--------|-------|-------|---|--------|-------|-------|---|-------|-------|-------|
| C | -5.98  | 5.16  | 3.08  | H | -10.12 | -4.46 | -2.73 | H | -5.15 | 5.15  | 2.37  |
| C | -6.23  | 6.81  | 0.59  | H | -10.03 | -2.11 | -6.25 | H | -5.09 | 3.61  | 4.24  |
| C | -7.06  | 4.11  | 5.00  | H | -10.07 | 0.02  | -5.36 | H | -5.07 | 2.40  | 5.93  |
| C | -5.94  | 4.28  | 4.15  | H | -9.77  | 4.69  | -5.14 | H | -5.37 | 0.03  | 6.34  |
| C | -7.54  | 0.08  | 6.36  | H | -9.97  | 2.42  | -4.98 | H | -5.76 | -2.04 | 6.73  |
| C | -7.19  | 2.86  | 5.79  | H | -9.60  | 6.30  | -3.31 | H | -5.85 | -4.18 | 5.55  |
| C | -6.08  | 2.02  | 6.04  | H | -9.60  | 5.88  | -1.06 | H | -5.71 | -4.47 | 3.22  |
| C | -7.73  | -1.37 | 6.11  | H | -9.04  | 6.53  | 3.62  | H | -5.78 | -5.35 | 0.94  |
| C | -6.67  | -2.30 | 6.20  | H | -9.42  | 5.93  | 1.37  | H | -6.01 | -6.59 | -0.97 |
| C | -6.26  | 0.66  | 6.29  | H | -8.97  | 5.00  | 5.52  | H | -5.47 | 5.19  | -2.73 |
| C | -7.85  | -3.88 | 4.75  | H | -9.35  | 2.94  | 5.97  | H | -5.64 | 3.59  | -4.55 |
| C | -6.72  | -3.52 | 5.53  | H | -9.78  | -1.16 | 5.43  | H | -5.95 | 2.51  | -6.53 |
| H | -9.84  | -5.56 | 3.77  | H | -9.64  | 0.60  | 6.52  | H | -6.04 | 0.09  | -6.90 |
| H | -9.91  | -6.45 | 1.48  | H | -9.87  | -3.29 | 4.28  | H | -5.87 | -1.55 | -5.27 |
| H | -10.07 | -5.25 | -0.43 | H | -5.46  | 7.03  | -1.39 | H | -5.88 | -3.63 | -4.01 |
| H | -10.04 | -4.21 | -4.99 | H | -5.28  | 7.06  | 1.05  | H | -6.05 | -5.79 | -3.28 |

### CORC[9]CPP

|   |       |       |       |   |       |       |       |   |        |       |       |
|---|-------|-------|-------|---|-------|-------|-------|---|--------|-------|-------|
| C | -6.33 | 5.39  | -2.17 | C | -8.82 | -1.44 | -6.29 | C | -7.48  | 6.07  | -0.02 |
| C | -6.42 | 4.75  | -3.40 | C | -8.99 | 1.40  | -5.63 | C | -8.67  | 6.35  | 0.69  |
| C | -6.76 | 3.04  | -5.89 | C | -7.37 | -3.21 | -5.45 | H | -9.61  | 6.17  | -1.77 |
| C | -6.44 | -1.17 | -6.40 | C | -8.65 | -2.73 | -5.78 | H | -9.75  | 5.09  | -3.93 |
| C | -6.79 | 1.79  | -6.51 | C | -7.14 | -5.57 | -1.86 | H | -9.80  | 2.93  | -4.39 |
| C | -6.27 | -2.46 | -5.92 | C | -7.20 | -4.25 | -4.40 | H | -9.83  | -1.07 | -6.43 |
| C | -6.08 | -4.15 | -3.54 | C | -8.21 | -5.15 | -4.02 | H | -9.85  | 0.77  | -5.45 |
| C | -6.04 | -6.01 | 0.36  | C | -7.21 | -5.88 | -0.42 | H | -9.54  | -3.30 | -5.51 |
| C | -6.05 | -4.79 | -2.31 | C | -8.43 | -5.77 | 0.28  | H | -9.07  | -5.31 | -4.67 |
| C | -6.06 | -5.80 | 1.74  | C | -8.19 | -5.79 | -2.78 | H | -9.36  | -5.69 | -0.28 |
| C | -6.16 | -3.84 | 3.92  | C | -7.26 | -5.45 | 2.40  | H | -9.02  | -6.43 | -2.50 |
| C | -6.47 | -0.55 | 6.67  | C | -8.45 | -5.56 | 1.66  | H | -9.40  | -5.32 | 2.13  |
| C | -6.23 | -2.85 | 4.89  | C | -7.37 | -2.69 | 5.70  | H | -9.15  | -5.35 | 4.48  |
| C | -6.64 | 0.83  | 6.75  | C | -7.23 | -4.72 | 3.68  | H | -9.73  | -1.44 | 6.38  |
| C | -6.91 | 3.69  | 5.98  | C | -8.32 | -4.65 | 4.58  | H | -9.26  | -3.63 | 6.21  |
| C | -6.44 | 5.54  | 2.14  | C | -7.57 | -1.40 | 6.39  | H | -10.03 | 0.96  | 6.61  |
| C | -6.84 | 4.71  | 5.03  | C | -8.85 | -0.82 | 6.51  | H | -10.00 | 2.49  | 5.21  |
| C | -6.34 | 5.77  | 0.77  | C | -8.38 | -3.67 | 5.57  | H | -9.73  | 6.28  | 2.55  |
| C | -7.48 | 5.83  | -1.48 | C | -7.91 | 1.43  | 6.59  | H | -9.88  | 4.27  | 3.58  |
| C | -8.70 | 5.79  | -2.21 | C | -9.02 | 0.56  | 6.62  | H | -9.56  | 6.68  | 0.16  |
| C | -7.66 | 4.52  | -4.02 | C | -7.88 | 4.90  | 4.09  | C | -9.44  | -2.78 | -0.77 |
| C | -8.78 | 5.15  | -3.45 | C | -8.01 | 2.80  | 6.03  | C | -8.90  | -2.35 | -1.97 |
| C | -7.86 | 0.90  | -6.32 | C | -9.12 | 3.13  | 5.22  | C | -7.70  | -1.54 | -2.02 |
| C | -7.81 | 3.46  | -5.04 | C | -7.69 | 5.61  | 2.80  | C | -7.31  | -0.61 | -3.05 |
| C | -8.96 | 2.65  | -5.02 | C | -8.77 | 6.12  | 2.06  | C | -6.46  | 0.47  | -2.78 |
| C | -7.72 | -0.57 | -6.47 | C | -9.05 | 4.15  | 4.27  | C | -8.83  | -2.45 | 0.50  |

|   |       |       |       |   |        |       |       |   |       |       |       |
|---|-------|-------|-------|---|--------|-------|-------|---|-------|-------|-------|
| C | -9.47 | -2.36 | 1.80  | H | -10.40 | -3.30 | -0.78 | H | -5.74 | 1.45  | 6.80  |
| C | -8.95 | -1.57 | 2.82  | H | -9.44  | -2.55 | -2.89 | H | -5.47 | -0.95 | 6.71  |
| C | -5.50 | 2.18  | 0.49  | H | -7.77  | -0.68 | -4.02 | H | -5.43 | -2.11 | 4.93  |
| C | -5.49 | 1.95  | -0.88 | H | -6.30  | 1.20  | -3.57 | H | -5.31 | -3.83 | 3.24  |
| C | -5.93 | 0.70  | -1.46 | H | -10.43 | -2.85 | 1.96  | H | -5.13 | -5.84 | 2.29  |
| C | -6.15 | -0.33 | -0.54 | H | -9.51  | -1.46 | 3.74  | H | -5.35 | 5.47  | -1.70 |
| C | -7.02 | -1.43 | -0.81 | H | -5.27  | 3.17  | 0.86  | H | -5.51 | 4.32  | -3.83 |
| C | -7.57 | -1.88 | 0.42  | H | -5.25  | 2.78  | -1.54 | H | -5.88 | 3.67  | -6.01 |
| C | -7.04 | -1.05 | 1.46  | H | -7.85  | 0.67  | 4.26  | H | -5.92 | 1.49  | -7.10 |
| C | -7.75 | -0.78 | 2.63  | H | -6.37  | 2.31  | 3.26  | H | -5.55 | -0.57 | -6.59 |
| C | -7.37 | 0.43  | 3.32  | H | -5.38  | 5.60  | 0.30  | H | -5.26 | -2.84 | -5.80 |
| C | -6.52 | 1.36  | 2.74  | H | -5.57  | 5.19  | 2.68  | H | -5.29 | -3.45 | -3.77 |
| C | -5.96 | 1.17  | 1.42  | H | -5.95  | 5.32  | 4.98  | H | -5.23 | -4.58 | -1.64 |
| C | -6.16 | -0.10 | 0.87  | H | -6.07  | 3.54  | 6.65  | H | -5.09 | -6.21 | -0.13 |

### SUMC[9]CPP

|   |       |       |       |   |        |       |       |   |        |       |       |
|---|-------|-------|-------|---|--------|-------|-------|---|--------|-------|-------|
| C | -9.13 | -5.40 | 3.24  | C | -8.20  | -1.53 | -6.03 | H | -10.16 | -4.80 | -0.34 |
| C | -9.14 | -5.78 | 1.90  | C | -6.98  | -2.04 | -5.54 | H | -10.24 | -4.02 | -4.88 |
| C | -9.29 | -4.99 | -0.97 | C | -8.17  | 2.72  | -5.89 | H | -10.21 | -4.06 | -2.66 |
| C | -9.32 | -3.47 | -5.05 | C | -8.29  | -0.09 | -6.35 | H | -10.29 | -2.04 | -6.31 |
| C | -9.32 | -4.57 | -2.29 | C | -7.18  | 0.67  | -6.78 | H | -10.30 | 0.08  | -5.56 |
| C | -9.35 | -2.34 | -5.86 | C | -7.96  | 3.98  | -5.14 | H | -9.99  | 4.75  | -5.28 |
| C | -9.42 | 0.63  | -5.89 | C | -6.72  | 4.20  | -4.52 | H | -10.20 | 2.48  | -5.18 |
| C | -9.03 | 4.82  | -4.76 | C | -7.12  | 2.05  | -6.56 | H | -9.79  | 6.27  | -3.37 |
| C | -9.36 | 2.00  | -5.67 | C | -7.73  | 5.74  | -2.91 | H | -9.83  | 5.97  | -1.19 |
| C | -8.92 | 5.68  | -3.67 | C | -6.61  | 5.06  | -3.42 | H | -9.30  | 6.35  | 3.52  |
| C | -8.87 | 6.15  | -0.72 | C | -7.55  | 6.16  | 1.33  | H | -9.70  | 5.93  | 1.24  |
| C | -8.46 | 5.67  | 3.66  | C | -7.71  | 6.23  | -1.51 | H | -9.29  | 4.88  | 5.47  |
| C | -8.80 | 6.13  | 0.67  | C | -6.49  | 6.50  | -0.84 | H | -9.74  | 2.77  | 5.97  |
| C | -8.46 | 4.83  | 4.78  | C | -7.43  | 5.61  | 2.70  | H | -10.15 | -1.36 | 5.91  |
| C | -8.85 | 2.19  | 6.18  | C | -6.34  | 4.76  | 2.98  | H | -10.02 | 0.49  | 6.72  |
| C | -9.25 | -1.97 | 5.91  | C | -6.42  | 6.46  | 0.55  | H | -10.17 | -3.42 | 4.64  |
| C | -9.01 | 0.87  | 6.59  | C | -7.44  | 3.88  | 4.98  | C | -9.13  | 2.54  | 0.47  |
| C | -9.26 | -3.16 | 5.19  | C | -6.34  | 3.92  | 4.09  | C | -8.91  | 1.69  | -0.63 |
| C | -8.00 | -4.80 | 3.81  | C | -7.90  | -0.01 | 6.69  | C | -8.63  | 0.34  | -0.34 |
| C | -6.81 | -4.80 | 3.05  | C | -7.58  | 2.72  | 5.88  | C | -7.86  | -0.24 | -1.41 |
| C | -8.01 | -5.58 | 1.08  | C | -6.47  | 1.93  | 6.25  | C | -6.95  | -1.27 | -1.14 |
| C | -6.82 | -5.18 | 1.71  | C | -8.05  | -1.47 | 6.48  | C | -5.75  | -1.39 | -1.87 |
| C | -8.18 | -4.64 | -3.12 | C | -6.95  | -2.35 | 6.49  | C | -8.95  | 2.08  | 1.81  |
| C | -8.11 | -5.51 | -0.40 | C | -6.63  | 0.60  | 6.63  | C | -4.95  | -2.15 | 1.71  |
| C | -7.01 | -5.71 | -1.26 | C | -8.09  | -3.91 | 4.99  | C | -6.78  | -1.74 | 0.21  |
| C | -8.14 | -3.83 | -4.35 | C | -6.96  | -3.54 | 5.76  | C | -7.51  | -1.17 | 1.25  |
| C | -6.95 | -3.16 | -4.71 | H | -10.05 | -5.51 | 3.82  | C | -8.45  | -0.11 | 0.97  |
| C | -7.05 | -5.29 | -2.58 | H | -10.06 | -6.18 | 1.47  | C | -8.55  | 0.76  | 2.07  |

|   |       |       |       |   |       |       |       |   |       |       |       |
|---|-------|-------|-------|---|-------|-------|-------|---|-------|-------|-------|
| C | -7.79 | 0.10  | 3.24  | H | -7.14 | 0.82  | 3.76  | H | -5.73 | -0.01 | 6.77  |
| C | -5.71 | -1.57 | 2.77  | H | -5.23 | -1.45 | 3.74  | H | -6.03 | -2.06 | 6.99  |
| C | -6.98 | -1.01 | 2.54  | H | -7.93 | 2.88  | -2.20 | H | -6.05 | -4.14 | 5.72  |
| C | -8.50 | 1.95  | -2.10 | H | -9.36 | 2.04  | -2.77 | H | -5.91 | -4.34 | 3.46  |
| C | -7.63 | 0.71  | -2.43 | H | -6.25 | 1.23  | -4.01 | H | -5.92 | -5.01 | 1.12  |
| C | -6.50 | 0.52  | -3.23 | H | -4.64 | -0.54 | -3.52 | H | -6.10 | -6.16 | -0.87 |
| C | -5.56 | -0.52 | -2.95 | H | -3.77 | -1.80 | -0.98 | H | -5.67 | 5.08  | -2.88 |
| C | -4.78 | -2.23 | -1.00 | H | -4.69 | -3.26 | -1.37 | H | -5.86 | 3.60  | -4.79 |
| C | -5.46 | -2.19 | 0.40  | H | -5.59 | 6.68  | -1.41 | H | -6.22 | 2.59  | -6.83 |
| H | -9.29 | 3.60  | 0.32  | H | -5.45 | 6.60  | 1.03  | H | -6.32 | 0.17  | -7.22 |
| H | -8.98 | 2.82  | 2.61  | H | -5.53 | 4.67  | 2.26  | H | -6.07 | -1.46 | -5.65 |
| H | -3.93 | -2.44 | 1.91  | H | -5.53 | 3.20  | 4.19  | H | -6.02 | -3.42 | -4.22 |
| H | -8.47 | -0.31 | 4.00  | H | -5.46 | 2.32  | 6.15  | H | -6.16 | -5.42 | -3.20 |

### [10]CPP

|   |       |       |       |   |       |       |       |   |       |       |       |
|---|-------|-------|-------|---|-------|-------|-------|---|-------|-------|-------|
| C | 6.50  | 0.49  | -1.20 | C | -6.98 | -0.15 | -0.20 | C | 6.72  | -1.66 | 0.04  |
| C | 6.88  | -0.19 | -0.03 | C | -6.81 | 1.32  | -0.27 | C | 6.16  | -2.23 | 1.20  |
| C | 6.87  | 1.97  | 1.13  | C | -6.59 | -0.83 | 0.97  | H | 6.30  | -0.07 | -2.11 |
| C | 7.15  | 0.60  | 1.11  | C | -6.96 | -2.30 | -1.36 | H | 7.03  | 2.53  | 2.05  |
| C | 6.22  | 1.86  | -1.19 | C | -7.24 | -0.94 | -1.35 | H | 7.52  | 0.13  | 2.02  |
| C | 5.57  | 3.89  | 0.10  | C | -6.40 | -2.94 | -0.24 | H | 5.80  | 2.31  | -2.08 |
| C | 6.31  | 2.61  | 0.00  | C | -6.31 | -2.19 | 0.96  | H | 4.98  | 3.55  | 2.15  |
| C | 4.83  | 4.17  | 1.27  | C | -4.92 | -4.50 | -1.50 | H | 4.14  | 6.25  | -1.92 |
| C | 4.32  | 5.66  | -1.02 | C | -5.66 | -4.22 | -0.33 | H | 5.96  | 4.60  | -1.91 |
| C | 5.35  | 4.72  | -1.02 | C | -4.41 | -6.00 | 0.79  | H | 3.17  | 5.19  | 2.14  |
| C | 3.46  | 5.81  | 0.09  | C | -5.44 | -5.06 | 0.78  | H | 1.88  | 5.87  | -2.10 |
| C | 3.80  | 5.10  | 1.26  | C | -3.89 | -5.44 | -1.49 | H | -0.48 | 7.41  | 1.97  |
| C | 1.38  | 6.25  | -1.22 | C | -2.20 | -6.75 | -0.21 | H | 1.96  | 7.14  | 2.01  |
| C | 2.11  | 6.41  | -0.02 | C | -3.55 | -6.14 | -0.32 | H | -0.54 | 6.14  | -2.15 |
| C | 0.03  | 7.07  | 1.07  | C | -1.47 | -6.58 | 0.99  | H | -2.09 | 5.78  | 2.05  |
| C | 1.42  | 6.92  | 1.10  | C | -0.12 | -7.41 | -1.30 | H | -4.79 | 5.77  | -2.11 |
| C | 0.00  | 6.40  | -1.24 | C | -1.51 | -7.25 | -1.33 | H | -2.66 | 6.99  | -2.05 |
| C | -2.17 | 6.43  | -0.01 | C | 0.63  | -7.06 | -0.16 | H | -4.21 | 4.57  | 1.99  |
| C | -0.72 | 6.73  | -0.07 | C | -0.09 | -6.74 | 1.01  | H | -5.14 | 3.51  | -2.28 |
| C | -2.70 | 5.82  | 1.15  | C | 2.61  | -6.16 | -1.38 | H | -7.44 | 1.78  | 1.75  |
| C | -4.21 | 5.77  | -1.19 | C | 2.08  | -6.76 | -0.22 | H | -6.43 | 4.01  | 1.81  |
| C | -3.00 | 6.46  | -1.16 | C | 4.12  | -6.11 | 0.96  | H | -6.14 | 1.29  | -2.33 |
| C | -4.65 | 5.01  | -0.08 | C | 2.91  | -6.80 | 0.93  | H | -6.39 | -0.26 | 1.88  |
| C | -3.91 | 5.13  | 1.11  | C | 3.82  | -5.47 | -1.34 | H | -7.12 | -2.87 | -2.28 |
| C | -5.68 | 3.16  | -1.40 | C | 5.55  | -4.26 | -0.02 | H | -7.62 | -0.46 | -2.25 |
| C | -5.64 | 3.92  | -0.21 | C | 4.55  | -5.35 | -0.15 | H | -5.89 | -2.65 | 1.85  |
| C | -6.94 | 2.15  | 0.86  | C | 5.59  | -3.50 | 1.17  | H | -5.07 | -3.89 | -2.39 |
| C | -6.36 | 3.42  | 0.89  | C | 6.85  | -2.49 | -1.10 | H | -4.23 | -6.58 | 1.69  |
| C | -6.25 | 1.90  | -1.43 | C | 6.27  | -3.76 | -1.12 | H | -6.05 | -4.93 | 1.68  |

|   |       |       |       |   |      |       |       |   |      |       |       |
|---|-------|-------|-------|---|------|-------|-------|---|------|-------|-------|
| H | -3.26 | -5.53 | -2.37 | H | 2.00 | -6.11 | -2.28 | H | 7.35 | -2.11 | -1.98 |
| H | -1.98 | -6.20 | 1.87  | H | 4.70 | -6.11 | 1.88  | H | 6.34 | -4.35 | -2.04 |
| H | 0.39  | -7.74 | -2.20 | H | 2.57 | -7.33 | 1.82  | H | 6.05 | -1.63 | 2.10  |
| H | -2.05 | -7.47 | -2.25 | H | 4.12 | -4.90 | -2.22 |   |      |       |       |
| H | 0.45  | -6.47 | 1.92  | H | 5.05 | -3.85 | 2.04  |   |      |       |       |

CORC[10]CPP-lying

|   |       |       |       |   |       |       |       |   |       |       |       |
|---|-------|-------|-------|---|-------|-------|-------|---|-------|-------|-------|
| C | 6.59  | 0.75  | -1.13 | C | -5.53 | -4.17 | -0.36 | H | -2.70 | 7.07  | -2.21 |
| C | 6.94  | 0.09  | 0.07  | C | -4.26 | -5.88 | 0.82  | H | -4.25 | 4.66  | 1.83  |
| C | 6.85  | 2.26  | 1.20  | C | -5.30 | -4.96 | 0.78  | H | -5.14 | 3.57  | -2.43 |
| C | 7.15  | 0.90  | 1.21  | C | -3.74 | -5.39 | -1.48 | H | -7.41 | 1.82  | 1.62  |
| C | 6.28  | 2.11  | -1.14 | C | -2.04 | -6.62 | -0.14 | H | -6.44 | 4.08  | 1.65  |
| C | 5.55  | 4.14  | 0.11  | C | -3.39 | -6.05 | -0.28 | H | -6.11 | 1.33  | -2.46 |
| C | 6.32  | 2.87  | 0.05  | C | -1.33 | -6.41 | 1.06  | H | -6.32 | -0.17 | 1.76  |
| C | 4.78  | 4.41  | 1.26  | C | 0.08  | -7.26 | -1.19 | H | -6.98 | -2.86 | -2.34 |
| C | 4.29  | 5.87  | -1.06 | C | -1.31 | -7.14 | -1.24 | H | -7.52 | -0.47 | -2.36 |
| C | 5.33  | 4.95  | -1.02 | C | 0.80  | -6.89 | -0.04 | H | -5.78 | -2.55 | 1.78  |
| C | 3.41  | 6.02  | 0.03  | C | 0.06  | -6.54 | 1.11  | H | -4.93 | -3.88 | -2.42 |
| C | 3.73  | 5.33  | 1.22  | C | 2.80  | -6.00 | -1.25 | H | -4.07 | -6.44 | 1.74  |
| C | 1.35  | 6.44  | -1.31 | C | 2.25  | -6.57 | -0.08 | H | -5.91 | -4.82 | 1.67  |
| C | 2.06  | 6.61  | -0.11 | C | 4.25  | -5.85 | 1.12  | H | -3.10 | -5.49 | -2.35 |
| C | -0.05 | 7.23  | 0.95  | C | 3.05  | -6.56 | 1.08  | H | -1.84 | -6.01 | 1.93  |
| C | 1.33  | 7.10  | 1.00  | C | 3.99  | -5.29 | -1.21 | H | 0.61  | -7.61 | -2.07 |
| C | -0.03 | 6.57  | -1.36 | C | 5.66  | -4.00 | 0.12  | H | -1.83 | -7.38 | -2.16 |
| C | -2.22 | 6.54  | -0.17 | C | 4.70  | -5.12 | 0.00  | H | 0.58  | -6.24 | 2.01  |
| C | -0.78 | 6.87  | -0.21 | C | 5.65  | -3.21 | 1.30  | H | 2.21  | -5.99 | -2.17 |
| C | -2.75 | 5.94  | 0.99  | C | 6.95  | -2.23 | -0.96 | H | 4.81  | -5.80 | 2.05  |
| C | -4.23 | 5.84  | -1.36 | C | 6.40  | -3.51 | -0.98 | H | 2.70  | -7.06 | 1.98  |
| C | -3.03 | 6.55  | -1.32 | C | 6.79  | -1.38 | 0.16  | H | 4.31  | -4.75 | -2.10 |
| C | -4.67 | 5.09  | -0.25 | C | 6.21  | -1.94 | 1.31  | H | 5.09  | -3.55 | 2.16  |
| C | -3.95 | 5.23  | 0.95  | H | 6.42  | 0.17  | -2.03 | H | 7.46  | -1.86 | -1.85 |
| C | -5.68 | 3.21  | -1.55 | H | 6.97  | 2.83  | 2.11  | H | 6.49  | -4.11 | -1.88 |
| C | -5.65 | 3.98  | -0.37 | H | 7.50  | 0.44  | 2.13  | H | 6.06  | -1.32 | 2.19  |
| C | -6.92 | 2.20  | 0.72  | H | 5.88  | 2.55  | -2.05 | C | 1.02  | -3.10 | 0.26  |
| C | -6.36 | 3.48  | 0.74  | H | 4.91  | 3.81  | 2.15  | C | 2.22  | -2.39 | 0.30  |
| C | -6.23 | 1.94  | -1.57 | H | 4.12  | 6.44  | -1.97 | C | 2.27  | -1.00 | 0.69  |
| C | -6.91 | -0.11 | -0.32 | H | 5.96  | 4.83  | -1.91 | C | 3.25  | 0.00  | 0.33  |
| C | -6.78 | 1.36  | -0.40 | H | 3.08  | 5.41  | 2.08  | C | 2.95  | 1.36  | 0.33  |
| C | -6.52 | -0.76 | 0.87  | H | 1.87  | 6.07  | -2.19 | C | -0.25 | -2.48 | 0.60  |
| C | -6.84 | -2.28 | -1.44 | H | -0.59 | 7.55  | 1.84  | C | -1.58 | -2.85 | 0.17  |
| C | -7.14 | -0.92 | -1.45 | H | 1.85  | 7.32  | 1.93  | C | -2.62 | -1.93 | 0.13  |
| C | -6.28 | -2.89 | -0.29 | H | -0.55 | 6.29  | -2.28 | C | -0.39 | 3.22  | 0.22  |
| C | -6.21 | -2.12 | 0.88  | H | -2.15 | 5.90  | 1.90  | C | 0.99  | 3.08  | 0.26  |
| C | -4.79 | -4.47 | -1.51 | H | -4.81 | 5.82  | -2.28 | C | 1.63  | 1.85  | 0.67  |

|   |       |       |      |   |       |       |       |   |       |       |       |
|---|-------|-------|------|---|-------|-------|-------|---|-------|-------|-------|
| C | 0.77  | 0.90  | 1.22 | C | -1.28 | 2.13  | 0.58  | H | -3.57 | -2.24 | -0.30 |
| C | 1.08  | -0.49 | 1.23 | C | -0.65 | 1.03  | 1.17  | H | -0.82 | 4.13  | -0.20 |
| C | -0.15 | -1.22 | 1.19 | H | 1.02  | -4.11 | -0.15 | H | 1.60  | 3.90  | -0.12 |
| C | -1.22 | -0.28 | 1.15 | H | 3.12  | -2.87 | -0.07 | H | -4.18 | 0.48  | -0.31 |
| C | -2.43 | -0.55 | 0.53 | H | 4.22  | -0.32 | -0.03 | H | -3.21 | 2.71  | -0.28 |
| C | -3.19 | 0.61  | 0.12 | H | 3.69  | 2.06  | -0.05 |   |       |       |       |
| C | -2.64 | 1.89  | 0.14 | H | -1.75 | -3.85 | -0.24 |   |       |       |       |

CORC[10]CPP-stand

|   |       |       |       |   |       |       |       |   |       |       |       |
|---|-------|-------|-------|---|-------|-------|-------|---|-------|-------|-------|
| C | 6.41  | 1.23  | -1.30 | C | -6.18 | -1.78 | 1.09  | H | 1.77  | 7.84  | 1.86  |
| C | 6.81  | 0.59  | -0.11 | C | -4.72 | -4.09 | -1.33 | H | -0.72 | 6.84  | -2.30 |
| C | 6.69  | 2.76  | 1.01  | C | -5.45 | -3.81 | -0.16 | H | -2.16 | 6.29  | 1.93  |
| C | 7.03  | 1.41  | 1.02  | C | -4.12 | -5.49 | 1.00  | H | -4.97 | 6.19  | -2.15 |
| C | 6.07  | 2.58  | -1.31 | C | -5.19 | -4.60 | 0.98  | H | -2.90 | 7.51  | -2.13 |
| C | 5.37  | 4.63  | -0.07 | C | -3.65 | -4.99 | -1.30 | H | -4.22 | 4.98  | 1.92  |
| C | 6.12  | 3.36  | -0.14 | C | -1.89 | -6.18 | 0.00  | H | -5.21 | 3.88  | -2.29 |
| C | 4.66  | 4.95  | 1.10  | C | -3.26 | -5.63 | -0.11 | H | -7.42 | 2.16  | 1.80  |
| C | 4.12  | 6.38  | -1.22 | C | -1.15 | -5.92 | 1.17  | H | -6.47 | 4.42  | 1.80  |
| C | 5.14  | 5.43  | -1.21 | C | 0.19  | -6.86 | -1.08 | H | -6.15 | 1.63  | -2.29 |
| C | 3.29  | 6.57  | -0.09 | C | -1.20 | -6.74 | -1.10 | H | -6.31 | 0.17  | 1.96  |
| C | 3.64  | 5.89  | 1.09  | C | 0.95  | -6.44 | 0.03  | H | -6.98 | -2.56 | -2.13 |
| C | 1.21  | 7.03  | -1.39 | C | 0.24  | -6.05 | 1.18  | H | -7.56 | -0.18 | -2.15 |
| C | 1.94  | 7.17  | -0.19 | C | 2.92  | -5.62 | -1.25 | H | -5.73 | -2.20 | 1.99  |
| C | -0.15 | 7.71  | 0.94  | C | 2.39  | -6.14 | -0.06 | H | -4.89 | -3.51 | -2.23 |
| C | 1.24  | 7.63  | 0.94  | C | 4.43  | -5.41 | 1.07  | H | -3.90 | -6.04 | 1.92  |
| C | -0.19 | 7.11  | -1.39 | C | 3.23  | -6.11 | 1.08  | H | -5.79 | -4.48 | 1.88  |
| C | -2.33 | 6.96  | -0.12 | C | 4.13  | -4.92 | -1.26 | H | -3.02 | -5.08 | -2.19 |
| C | -0.90 | 7.35  | -0.20 | C | 5.79  | -3.56 | 0.01  | H | -1.65 | -5.50 | 2.04  |
| C | -2.79 | 6.31  | 1.05  | C | 4.86  | -4.71 | -0.07 | H | 0.69  | -7.24 | -1.97 |
| C | -4.36 | 6.21  | -1.25 | C | 5.80  | -2.78 | 1.18  | H | -1.75 | -7.02 | -1.99 |
| C | -3.19 | 6.96  | -1.24 | C | 6.91  | -1.72 | -1.14 | H | 0.78  | -5.71 | 2.06  |
| C | -4.74 | 5.43  | -0.13 | C | 6.44  | -3.03 | -1.13 | H | 2.32  | -5.64 | -2.16 |
| C | -3.97 | 5.57  | 1.04  | C | 6.75  | -0.88 | -0.02 | H | 5.01  | -5.35 | 1.99  |
| C | -5.73 | 3.53  | -1.40 | C | 6.27  | -1.47 | 1.17  | H | 2.89  | -6.58 | 2.01  |
| C | -5.70 | 4.31  | -0.23 | H | 6.21  | 0.64  | -2.19 | H | 4.43  | -4.42 | -2.17 |
| C | -6.94 | 2.53  | 0.90  | H | 6.82  | 3.35  | 1.92  | H | 5.31  | -3.15 | 2.08  |
| C | -6.40 | 3.82  | 0.90  | H | 7.41  | 0.97  | 1.94  | H | 7.35  | -1.32 | -2.05 |
| C | -6.27 | 2.25  | -1.40 | H | 5.62  | 3.00  | -2.21 | H | 6.52  | -3.63 | -2.03 |
| C | -6.92 | 0.21  | -0.12 | H | 4.80  | 4.35  | 2.00  | H | 6.12  | -0.86 | 2.06  |
| C | -6.80 | 1.68  | -0.22 | H | 3.93  | 6.94  | -2.13 | C | 2.14  | -1.89 | 1.94  |
| C | -6.51 | -0.43 | 1.07  | H | 5.72  | 5.27  | -2.11 | C | 2.62  | -2.22 | 0.68  |
| C | -6.83 | -1.97 | -1.22 | H | 3.02  | 6.00  | 1.98  | C | 3.08  | -1.22 | -0.25 |
| C | -7.16 | -0.61 | -1.24 | H | 1.71  | 6.70  | -2.29 | C | 3.15  | -1.29 | -1.69 |
| C | -6.24 | -2.56 | -0.09 | H | -0.67 | 7.99  | 1.85  | C | 3.10  | -0.15 | -2.49 |

|   |      |       |       |   |      |       |       |   |       |       |       |
|---|------|-------|-------|---|------|-------|-------|---|-------|-------|-------|
| C | 2.07 | -0.52 | 2.40  | C | 2.33 | 1.79  | 1.55  | H | 3.05  | -0.27 | -3.57 |
| C | 1.19 | 0.05  | 3.39  | C | 1.32 | 2.30  | 2.36  | H | 0.70  | -0.61 | 4.11  |
| C | 0.83 | 1.40  | 3.38  | C | 0.70 | 3.52  | 1.87  | H | 0.08  | 1.75  | 4.08  |
| C | 1.89 | 3.40  | -1.76 | C | 0.96 | 4.01  | 0.59  | H | 1.39  | 4.23  | -2.27 |
| C | 2.42 | 2.37  | -2.53 | C | 1.86 | 3.34  | -0.32 | H | 2.32  | 2.42  | -3.61 |
| C | 2.97 | 1.17  | -1.92 | C | 2.60 | 2.30  | 0.24  | H | -0.07 | 4.01  | 2.47  |
| C | 3.13 | 1.24  | -0.54 | H | 1.71 | -2.68 | 2.56  | H | 0.39  | 4.87  | 0.24  |
| C | 3.19 | 0.07  | 0.28  | H | 2.55 | -3.26 | 0.35  |   |       |       |       |
| C | 2.70 | 0.41  | 1.57  | H | 3.14 | -2.27 | -2.17 |   |       |       |       |

### SUMC[10]CPP-lying

|   |       |       |       |   |       |       |       |   |       |       |       |
|---|-------|-------|-------|---|-------|-------|-------|---|-------|-------|-------|
| C | 6.46  | 0.67  | -1.00 | C | -7.06 | -0.81 | -1.13 | H | 5.93  | 4.69  | -1.84 |
| C | 6.82  | 0.00  | 0.19  | C | -6.26 | -2.80 | 0.03  | H | 3.31  | 5.58  | 2.27  |
| C | 6.84  | 2.17  | 1.31  | C | -6.18 | -2.03 | 1.21  | H | 1.92  | 6.04  | -2.02 |
| C | 7.08  | 0.80  | 1.32  | C | -4.83 | -4.44 | -1.19 | H | -0.44 | 7.65  | 2.02  |
| C | 6.21  | 2.04  | -1.01 | C | -5.56 | -4.10 | -0.03 | H | 1.99  | 7.38  | 2.07  |
| C | 5.61  | 4.12  | 0.22  | C | -4.36 | -5.88 | 1.14  | H | -0.50 | 6.30  | -2.07 |
| C | 6.31  | 2.81  | 0.16  | C | -5.36 | -4.91 | 1.11  | H | -2.13 | 6.17  | 2.16  |
| C | 4.94  | 4.49  | 1.40  | C | -3.83 | -5.41 | -1.17 | H | -4.70 | 5.84  | -2.06 |
| C | 4.33  | 5.82  | -0.96 | C | -2.18 | -6.72 | 0.15  | H | -2.58 | 7.07  | -2.03 |
| C | 5.36  | 4.88  | -0.93 | C | -3.51 | -6.09 | 0.03  | H | -4.24 | 4.96  | 2.13  |
| C | 3.51  | 6.04  | 0.16  | C | -1.45 | -6.54 | 1.35  | H | -5.03 | 3.65  | -2.13 |
| C | 3.90  | 5.43  | 1.37  | C | -0.09 | -7.39 | -0.93 | H | -7.29 | 1.94  | 1.93  |
| C | 1.42  | 6.44  | -1.14 | C | -1.48 | -7.24 | -0.96 | H | -6.34 | 4.20  | 1.94  |
| C | 2.15  | 6.63  | 0.05  | C | 0.66  | -7.03 | 0.21  | H | -5.98 | 1.41  | -2.14 |
| C | 0.07  | 7.30  | 1.13  | C | -0.07 | -6.69 | 1.38  | H | -6.24 | -0.08 | 2.09  |
| C | 1.45  | 7.15  | 1.16  | C | 2.61  | -6.11 | -1.03 | H | -6.94 | -2.75 | -2.03 |
| C | 0.04  | 6.59  | -1.17 | C | 2.10  | -6.70 | 0.14  | H | -7.42 | -0.35 | -2.05 |
| C | -2.13 | 6.65  | 0.05  | C | 4.11  | -5.93 | 1.30  | H | -5.78 | -2.48 | 2.11  |
| C | -0.68 | 6.94  | -0.01 | C | 2.92  | -6.67 | 1.29  | H | -4.96 | -3.85 | -2.10 |
| C | -2.70 | 6.15  | 1.24  | C | 3.79  | -5.38 | -1.02 | H | -4.19 | -6.45 | 2.05  |
| C | -4.14 | 5.91  | -1.13 | C | 5.48  | -4.07 | 0.27  | H | -5.95 | -4.74 | 2.00  |
| C | -2.94 | 6.61  | -1.11 | C | 4.52  | -5.19 | 0.18  | H | -3.20 | -5.53 | -2.04 |
| C | -4.60 | 5.22  | 0.01  | C | 5.52  | -3.29 | 1.45  | H | -1.95 | -6.15 | 2.23  |
| C | -3.91 | 5.45  | 1.22  | C | 6.75  | -2.31 | -0.85 | H | 0.42  | -7.73 | -1.83 |
| C | -5.57 | 3.31  | -1.25 | C | 6.19  | -3.58 | -0.85 | H | -2.01 | -7.47 | -1.88 |
| C | -5.56 | 4.09  | -0.08 | C | 6.63  | -1.46 | 0.28  | H | 0.47  | -6.41 | 2.28  |
| C | -6.80 | 2.31  | 1.03  | C | 6.08  | -2.02 | 1.45  | H | 2.01  | -6.11 | -1.94 |
| C | -6.26 | 3.60  | 1.04  | H | 6.24  | 0.09  | -1.90 | H | 4.69  | -5.89 | 2.22  |
| C | -6.11 | 2.03  | -1.26 | H | 7.00  | 2.75  | 2.22  | H | 2.60  | -7.18 | 2.19  |
| C | -6.81 | 0.00  | 0.00  | H | 7.44  | 0.34  | 2.24  | H | 4.08  | -4.83 | -1.91 |
| C | -6.66 | 1.47  | -0.09 | H | 5.81  | 2.48  | -1.92 | H | 4.99  | -3.63 | 2.33  |
| C | -6.44 | -0.66 | 1.19  | H | 5.12  | 3.95  | 2.32  | H | 7.24  | -1.94 | -1.75 |
| C | -6.79 | -2.18 | -1.12 | H | 4.12  | 6.35  | -1.89 | H | 6.25  | -4.19 | -1.75 |



|   |       |       |       |   |       |       |       |   |       |       |       |
|---|-------|-------|-------|---|-------|-------|-------|---|-------|-------|-------|
| H | 5.97  | -1.40 | 2.34  | C | -2.66 | 0.17  | -0.42 | H | 0.77  | -4.28 | 0.05  |
| C | -2.28 | 2.42  | 0.53  | C | -3.02 | -1.34 | -0.41 | H | -3.81 | -1.58 | -1.13 |
| C | -0.97 | 2.47  | 0.02  | C | -1.07 | -3.22 | -0.39 | H | -3.39 | -1.66 | 0.57  |
| C | -0.58 | 1.41  | -0.82 | C | -1.67 | -2.01 | -0.76 | H | -1.66 | -4.03 | 0.03  |
| C | 0.85  | 1.26  | -0.81 | C | 0.32  | 3.21  | 0.46  | H | 0.33  | 3.39  | 1.54  |
| C | 1.42  | 0.00  | -1.01 | C | 1.44  | 2.22  | 0.04  | H | 0.42  | 4.18  | -0.03 |
| C | 2.62  | -0.38 | -0.38 | C | 2.69  | 1.90  | 0.57  | H | 3.19  | 2.58  | 1.26  |
| C | -3.12 | 1.28  | 0.31  | C | 3.28  | 0.61  | 0.36  | H | 4.20  | 0.38  | 0.90  |
| C | 0.36  | -3.37 | -0.38 | C | 2.66  | -1.93 | -0.36 | H | 2.94  | -2.32 | 0.62  |
| C | 0.58  | -1.15 | -1.23 | C | 1.20  | -2.31 | -0.74 | H | 3.40  | -2.33 | -1.07 |
| C | -0.81 | -1.00 | -1.24 | H | -2.63 | 3.18  | 1.21  |   |       |       |       |
| C | -1.40 | 0.30  | -1.03 | H | -4.07 | 1.24  | 0.83  |   |       |       |       |

### SUMC[10]CPP-stand

|   |       |       |       |   |       |       |       |   |       |       |       |
|---|-------|-------|-------|---|-------|-------|-------|---|-------|-------|-------|
| C | 6.43  | 0.47  | -1.22 | C | -6.82 | 1.30  | -0.33 | H | 6.19  | -0.10 | -2.12 |
| C | 6.89  | -0.20 | -0.07 | C | -6.80 | -0.85 | 0.93  | H | 7.08  | 2.51  | 2.00  |
| C | 6.89  | 1.95  | 1.09  | C | -6.96 | -2.31 | -1.43 | H | 7.62  | 0.12  | 1.94  |
| C | 7.19  | 0.59  | 1.06  | C | -7.22 | -0.94 | -1.44 | H | 5.67  | 2.28  | -2.07 |
| C | 6.14  | 1.83  | -1.20 | C | -6.51 | -2.96 | -0.26 | H | 4.97  | 3.51  | 2.16  |
| C | 5.55  | 3.87  | 0.11  | C | -6.55 | -2.22 | 0.94  | H | 4.12  | 6.26  | -1.88 |
| C | 6.28  | 2.58  | -0.01 | C | -4.97 | -4.50 | -1.47 | H | 5.93  | 4.59  | -1.90 |
| C | 4.82  | 4.14  | 1.28  | C | -5.73 | -4.22 | -0.32 | H | 3.17  | 5.16  | 2.18  |
| C | 4.30  | 5.66  | -0.99 | C | -4.41 | -5.90 | 0.86  | H | 1.88  | 5.90  | -2.06 |
| C | 5.33  | 4.71  | -1.00 | C | -5.48 | -5.01 | 0.82  | H | -0.49 | 7.36  | 2.03  |
| C | 3.45  | 5.79  | 0.13  | C | -3.90 | -5.39 | -1.44 | H | 1.94  | 7.09  | 2.08  |
| C | 3.80  | 5.08  | 1.30  | C | -2.19 | -6.64 | -0.13 | H | -0.54 | 6.17  | -2.11 |
| C | 1.38  | 6.27  | -1.17 | C | -3.54 | -6.05 | -0.24 | H | -2.12 | 5.74  | 2.08  |
| C | 2.11  | 6.41  | 0.03  | C | -1.46 | -6.48 | 1.07  | H | -4.77 | 5.76  | -2.10 |
| C | 0.02  | 7.04  | 1.13  | C | -0.11 | -7.28 | -1.22 | H | -2.65 | 7.00  | -2.01 |
| C | 1.41  | 6.89  | 1.16  | C | -1.49 | -7.13 | -1.25 | H | -4.23 | 4.52  | 1.99  |
| C | 0.00  | 6.42  | -1.19 | C | 0.64  | -6.95 | -0.08 | H | -5.01 | 3.46  | -2.27 |
| C | -2.17 | 6.41  | 0.02  | C | -0.08 | -6.63 | 1.09  | H | -7.54 | 1.79  | 1.65  |
| C | -0.73 | 6.72  | -0.02 | C | 2.63  | -6.10 | -1.31 | H | -6.50 | 4.01  | 1.74  |
| C | -2.71 | 5.80  | 1.17  | C | 2.09  | -6.67 | -0.14 | H | -6.04 | 1.24  | -2.35 |
| C | -4.20 | 5.76  | -1.18 | C | 4.16  | -6.07 | 1.01  | H | -6.67 | -0.29 | 1.86  |
| C | -2.99 | 6.46  | -1.13 | C | 2.92  | -6.71 | 1.00  | H | -7.05 | -2.86 | -2.36 |
| C | -4.64 | 4.99  | -0.09 | C | 3.86  | -5.46 | -1.30 | H | -7.51 | -0.46 | -2.37 |
| C | -3.91 | 5.10  | 1.12  | C | 5.65  | -4.30 | -0.03 | H | -6.24 | -2.69 | 1.87  |
| C | -5.60 | 3.12  | -1.42 | C | 4.62  | -5.36 | -0.12 | H | -5.12 | -3.90 | -2.37 |
| C | -5.62 | 3.89  | -0.24 | C | 5.81  | -3.58 | 1.17  | H | -4.21 | -6.45 | 1.78  |
| C | -6.99 | 2.14  | 0.79  | C | 6.83  | -2.49 | -1.17 | H | -6.09 | -4.88 | 1.72  |
| C | -6.40 | 3.41  | 0.84  | C | 6.28  | -3.77 | -1.18 | H | -3.26 | -5.46 | -2.31 |
| C | -6.19 | 1.86  | -1.46 | C | 6.78  | -1.68 | -0.01 | H | -1.96 | -6.09 | 1.95  |
| C | -7.04 | -0.16 | -0.27 | C | 6.35  | -2.30 | 1.18  | H | 0.40  | -7.61 | -2.13 |

|   |       |       |       |   |       |       |       |   |       |       |       |
|---|-------|-------|-------|---|-------|-------|-------|---|-------|-------|-------|
| H | -2.03 | -7.34 | -2.17 | C | 2.30  | -2.90 | 0.52  | C | 1.05  | -2.87 | 2.59  |
| H | 0.46  | -6.36 | 2.00  | C | -3.43 | -1.67 | -0.74 | H | -3.03 | -1.08 | -2.78 |
| H | 2.01  | -6.04 | -2.20 | C | 0.36  | -2.29 | 3.67  | H | -4.29 | -1.02 | -0.68 |
| H | 4.75  | -6.08 | 1.92  | C | 0.27  | -3.39 | 1.55  | H | 0.91  | -1.83 | 4.50  |
| H | 2.57  | -7.20 | 1.91  | C | -1.12 | -3.24 | 1.52  | H | -4.00 | -2.72 | 2.31  |
| H | 4.17  | -4.92 | -2.19 | C | -1.80 | -3.12 | 0.26  | H | -3.41 | -1.06 | 2.16  |
| H | 5.37  | -3.96 | 2.09  | C | -2.96 | -2.33 | 0.41  | H | -1.53 | -1.56 | 4.44  |
| H | 7.25  | -2.08 | -2.09 | C | -3.17 | -2.11 | 1.93  | H | -0.09 | -1.20 | -3.29 |
| H | 6.28  | -4.33 | -2.11 | C | -1.06 | -2.14 | 3.64  | H | -0.26 | -2.87 | -3.85 |
| H | 6.31  | -1.72 | 2.10  | C | -1.81 | -2.55 | 2.53  | H | 2.77  | -1.71 | -2.66 |
| C | -2.69 | -1.71 | -1.96 | C | -0.21 | -2.24 | -2.95 | H | 3.94  | -1.92 | -0.51 |
| C | -1.47 | -2.41 | -2.05 | C | 0.94  | -2.67 | -2.00 | H | 2.94  | -1.76 | 2.30  |
| C | -1.08 | -3.16 | -0.93 | C | 2.27  | -2.26 | -1.86 | H | 3.16  | -3.51 | 2.46  |
| C | 0.35  | -3.32 | -0.90 | C | 2.95  | -2.37 | -0.60 |   |       |       |       |
| C | 1.01  | -3.43 | 0.32  | C | 2.50  | -2.73 | 2.05  |   |       |       |       |

### [11]CPP

|   |       |       |       |   |       |       |       |   |       |       |       |
|---|-------|-------|-------|---|-------|-------|-------|---|-------|-------|-------|
| C | 0.51  | -4.36 | -6.74 | C | -0.59 | -6.57 | -3.86 | C | -0.50 | 7.25  | -2.95 |
| C | 0.42  | -5.48 | -5.91 | C | -1.74 | -6.89 | -3.10 | C | -0.66 | 7.16  | 0.05  |
| C | 0.65  | -6.97 | -3.32 | C | -0.27 | -7.72 | 0.28  | C | 0.50  | 5.77  | -4.62 |
| C | 0.90  | -7.24 | 0.92  | C | -1.36 | -8.06 | 1.11  | C | -0.55 | 6.60  | -4.19 |
| C | 0.75  | -7.49 | -2.03 | C | -1.64 | -7.38 | -1.80 | C | 0.08  | 2.28  | -7.08 |
| C | 0.92  | -6.98 | 2.28  | C | -0.23 | -7.17 | 3.08  | C | 0.32  | 4.75  | -5.68 |
| C | 0.85  | -6.33 | 5.21  | C | -1.34 | -7.79 | 2.47  | C | -0.92 | 4.10  | -5.80 |
| C | 1.12  | -2.51 | 7.07  | C | -0.23 | -4.51 | 6.44  | C | 0.02  | 0.84  | -7.42 |
| C | 0.88  | -5.36 | 6.22  | C | -0.29 | -6.50 | 4.40  | C | -1.19 | 0.20  | -7.78 |
| C | 1.19  | -1.15 | 7.37  | C | -1.45 | -5.77 | 4.74  | C | -1.04 | 2.89  | -6.48 |
| C | 1.22  | 1.80  | 7.88  | C | -0.09 | -3.22 | 7.16  | C | -0.27 | -1.99 | -7.25 |
| C | 1.59  | 5.04  | 5.11  | C | -1.19 | -2.55 | 7.73  | C | -1.33 | -1.18 | -7.69 |
| C | 1.30  | 3.11  | 7.40  | C | -1.42 | -4.80 | 5.74  | H | 1.39  | -4.23 | -7.38 |
| C | 1.66  | 5.88  | 4.00  | C | 0.05  | -0.44 | 7.78  | H | 1.23  | -6.21 | -5.93 |
| C | 1.68  | 7.55  | 1.51  | C | -1.13 | -1.19 | 8.03  | H | 1.57  | -6.78 | -3.87 |
| C | 1.73  | 6.40  | -2.61 | C | 0.22  | 3.71  | 6.72  | H | 1.77  | -6.96 | 0.32  |
| C | 1.70  | 7.67  | 0.12  | C | 0.05  | 1.04  | 7.69  | H | 1.73  | -7.73 | -1.64 |
| C | 1.68  | 5.76  | -3.84 | C | -1.08 | 1.70  | 7.17  | H | 1.80  | -6.51 | 2.71  |
| C | 1.40  | 4.22  | -6.42 | C | 0.39  | 4.89  | 5.84  | H | 1.73  | -6.93 | 5.03  |
| C | 1.12  | 0.01  | -7.15 | C | -0.67 | 5.75  | 5.51  | H | 2.00  | -2.99 | 6.63  |
| C | 1.28  | 3.01  | -7.11 | C | -1.00 | 3.00  | 6.69  | H | 1.79  | -5.23 | 6.80  |
| C | 0.99  | -1.38 | -7.07 | C | 0.54  | 6.62  | 3.57  | H | 2.11  | -0.62 | 7.17  |
| C | -0.48 | -3.36 | -6.72 | C | -0.60 | 6.60  | 4.40  | H | 2.08  | 1.36  | 8.35  |
| C | -1.64 | -3.61 | -5.95 | C | 0.55  | 7.39  | -0.65 | H | 2.44  | 4.39  | 5.33  |
| C | -0.65 | -5.64 | -5.01 | C | 0.51  | 7.15  | 2.19  | H | 2.24  | 3.66  | 7.51  |
| C | -1.72 | -4.72 | -5.12 | C | -0.67 | 7.04  | 1.44  | H | 2.56  | 5.87  | 3.39  |
| C | -0.39 | -7.61 | -1.20 | C | 0.61  | 7.09  | -2.10 | H | 2.59  | 7.73  | 2.07  |

|   |       |       |       |   |       |       |       |   |       |       |       |
|---|-------|-------|-------|---|-------|-------|-------|---|-------|-------|-------|
| H | 2.61  | 6.27  | -1.98 | H | -2.25 | -8.51 | 0.67  | H | -1.46 | 7.21  | 4.15  |
| H | 2.63  | 7.93  | -0.38 | H | -2.55 | -7.50 | -1.22 | H | -1.60 | 6.74  | 1.92  |
| H | 2.51  | 5.13  | -4.14 | H | -2.22 | -8.01 | 3.07  | H | -1.35 | 7.84  | -2.63 |
| H | 2.36  | 4.74  | -6.41 | H | -2.35 | -5.88 | 4.14  | H | -1.56 | 6.94  | -0.51 |
| H | 2.08  | 0.46  | -6.88 | H | -2.13 | -3.08 | 7.89  | H | -1.45 | 6.70  | -4.80 |
| H | 2.15  | 2.61  | -7.62 | H | -2.29 | -4.17 | 5.89  | H | -1.78 | 4.47  | -5.25 |
| H | 1.83  | -1.97 | -6.73 | H | -2.01 | -0.69 | 8.42  | H | -2.05 | 0.80  | -8.08 |
| H | -2.43 | -2.87 | -5.91 | H | -2.01 | 1.14  | 7.01  | H | -1.99 | 2.36  | -6.45 |
| H | -2.57 | -4.80 | -4.45 | H | -1.59 | 5.73  | 6.10  | H | -2.30 | -1.63 | -7.92 |
| H | -2.73 | -6.68 | -3.50 | H | -1.86 | 3.43  | 6.18  |   |       |       |       |

### CORC[11]CPP-lying

|   |       |       |       |   |       |       |       |   |       |       |       |
|---|-------|-------|-------|---|-------|-------|-------|---|-------|-------|-------|
| C | 0.41  | -3.71 | -6.80 | C | -0.32 | -7.34 | 2.75  | C | -0.39 | -1.35 | -7.25 |
| C | 0.33  | -4.87 | -6.03 | C | -1.44 | -7.89 | 2.10  | C | -1.46 | -0.56 | -7.72 |
| C | 0.56  | -6.56 | -3.57 | C | -0.32 | -4.74 | 6.13  | H | 1.28  | -3.55 | -7.44 |
| C | 0.83  | -7.29 | 0.60  | C | -0.39 | -6.72 | 4.09  | H | 1.14  | -5.60 | -6.09 |
| C | 0.66  | -7.21 | -2.35 | C | -1.56 | -6.01 | 4.46  | H | 1.48  | -6.32 | -4.10 |
| C | 0.84  | -7.13 | 1.98  | C | -0.17 | -3.43 | 6.80  | H | 1.70  | -6.98 | 0.04  |
| C | 0.75  | -6.56 | 4.91  | C | -1.27 | -2.71 | 7.32  | H | 1.65  | -7.50 | -1.99 |
| C | 1.05  | -2.74 | 6.68  | C | -1.52 | -5.04 | 5.46  | H | 1.73  | -6.70 | 2.45  |
| C | 0.78  | -5.59 | 5.91  | C | -0.01 | -0.62 | 7.27  | H | 1.64  | -7.15 | 4.71  |
| C | 1.13  | -1.37 | 6.91  | C | -1.19 | -1.34 | 7.55  | H | 1.92  | -3.25 | 6.28  |
| C | 1.19  | 1.60  | 7.25  | C | 0.20  | 3.50  | 6.08  | H | 1.70  | -5.45 | 6.48  |
| C | 1.54  | 4.85  | 4.48  | C | 0.01  | 0.85  | 7.11  | H | 2.06  | -0.85 | 6.68  |
| C | 1.28  | 2.90  | 6.74  | C | -1.12 | 1.51  | 6.58  | H | 2.06  | 1.15  | 7.72  |
| C | 1.62  | 5.77  | 3.44  | C | 0.36  | 4.70  | 5.24  | H | 2.36  | 4.15  | 4.63  |
| C | 1.68  | 7.76  | 1.19  | C | -0.69 | 5.61  | 5.00  | H | 2.23  | 3.43  | 6.83  |
| C | 1.75  | 7.01  | -2.99 | C | -1.03 | 2.80  | 6.08  | H | 2.50  | 5.78  | 2.81  |
| C | 1.71  | 8.04  | -0.17 | C | 0.52  | 6.60  | 3.12  | H | 2.60  | 7.85  | 1.78  |
| C | 1.68  | 6.42  | -4.24 | C | -0.61 | 6.54  | 3.96  | H | 2.63  | 6.82  | -2.37 |
| C | 1.33  | 4.89  | -6.80 | C | 0.57  | 7.87  | -0.97 | H | 2.65  | 8.35  | -0.63 |
| C | 1.00  | 0.66  | -7.23 | C | 0.50  | 7.29  | 1.81  | H | 2.50  | 5.78  | -4.57 |
| C | 1.18  | 3.65  | -7.42 | C | -0.68 | 7.29  | 1.04  | H | 2.29  | 5.39  | -6.84 |
| C | 0.86  | -0.72 | -7.08 | C | 0.65  | 7.69  | -2.44 | H | 1.95  | 1.12  | -6.97 |
| C | -0.59 | -2.72 | -6.73 | C | -0.46 | 7.92  | -3.29 | H | 2.03  | 3.21  | -7.94 |
| C | -1.72 | -2.99 | -5.94 | C | -0.65 | 7.57  | -0.32 | H | 1.71  | -1.30 | -6.71 |
| C | -0.74 | -5.08 | -5.13 | C | 0.50  | 6.48  | -5.01 | H | -2.51 | -2.25 | -5.86 |
| C | -1.79 | -4.14 | -5.16 | C | -0.53 | 7.33  | -4.55 | H | -2.63 | -4.25 | -4.48 |
| C | -0.47 | -7.41 | -1.53 | C | -0.03 | 2.92  | -7.32 | H | -2.82 | -6.20 | -3.69 |
| C | -0.68 | -6.09 | -4.05 | C | 0.27  | 5.46  | -6.05 | H | -2.35 | -8.46 | 0.25  |
| C | -1.83 | -6.47 | -3.33 | C | -0.98 | 4.82  | -6.11 | H | -2.63 | -7.26 | -1.51 |
| C | -0.35 | -7.68 | -0.08 | C | -0.11 | 1.47  | -7.56 | H | -2.33 | -8.14 | 2.67  |
| C | -1.45 | -8.07 | 0.72  | C | -1.32 | 0.82  | -7.87 | H | -2.46 | -6.12 | 3.86  |
| C | -1.73 | -7.10 | -2.09 | C | -1.13 | 3.58  | -6.73 | H | -2.21 | -3.22 | 7.50  |

|   |       |       |       |   |       |       |       |   |       |       |       |
|---|-------|-------|-------|---|-------|-------|-------|---|-------|-------|-------|
| H | -2.40 | -4.42 | 5.61  | C | -0.08 | -3.03 | 2.64  | C | 0.68  | 2.39  | -0.28 |
| H | -2.08 | -0.81 | 7.90  | C | 0.29  | -3.12 | 1.24  | C | 0.62  | 1.86  | -1.57 |
| H | -2.05 | 0.96  | 6.45  | C | -0.20 | -4.02 | 0.22  | C | 0.81  | 0.45  | -1.83 |
| H | -1.59 | 5.56  | 5.61  | C | -0.14 | -3.70 | -1.14 | C | 1.26  | -0.29 | -0.74 |
| H | -1.89 | 3.24  | 5.57  | C | 0.62  | -0.65 | 2.78  | H | -0.31 | -1.82 | 4.39  |
| H | -1.45 | 7.21  | 3.78  | C | 0.44  | 0.74  | 3.17  | H | -0.57 | -3.87 | 3.12  |
| H | -1.61 | 6.94  | 1.49  | C | 0.59  | 1.79  | 2.27  | H | -0.72 | -4.93 | 0.52  |
| H | -1.30 | 8.52  | -2.93 | C | 0.35  | -0.35 | -2.95 | H | -0.61 | -4.37 | -1.85 |
| H | -1.55 | 7.43  | -0.91 | C | 0.17  | -1.73 | -2.84 | H | 0.09  | 0.96  | 4.18  |
| H | -1.42 | 7.47  | -5.15 | C | 0.42  | -2.44 | -1.60 | H | 0.34  | 2.80  | 2.60  |
| H | -1.82 | 5.23  | -5.56 | C | 1.07  | -1.70 | -0.63 | H | 0.05  | 0.14  | -3.87 |
| H | -2.17 | 1.40  | -8.20 | C | 1.01  | -2.03 | 0.76  | H | -0.27 | -2.27 | -3.68 |
| H | -2.08 | 3.06  | -6.64 | C | 1.17  | -0.82 | 1.51  | H | 0.42  | 3.44  | -0.14 |
| H | -2.42 | -1.03 | -7.92 | C | 1.32  | 0.25  | 0.58  | H | 0.32  | 2.52  | -2.39 |
| C | 0.08  | -1.85 | 3.37  | C | 0.93  | 1.56  | 0.88  |   |       |       |       |

### CORC[11]CPP-stand

|   |       |       |       |   |       |       |       |   |       |       |       |
|---|-------|-------|-------|---|-------|-------|-------|---|-------|-------|-------|
| C | 0.66  | -4.22 | -6.69 | C | -0.53 | -6.41 | -3.84 | C | -0.60 | 7.24  | -2.92 |
| C | 0.58  | -5.30 | -5.82 | C | -1.70 | -6.72 | -3.11 | C | -0.70 | 7.18  | 0.08  |
| C | 0.69  | -6.81 | -3.26 | C | -0.34 | -7.73 | 0.27  | C | 0.40  | 5.78  | -4.60 |
| C | 0.85  | -7.45 | 0.97  | C | -1.49 | -7.96 | 1.05  | C | -0.66 | 6.59  | -4.15 |
| C | 0.75  | -7.36 | -1.98 | C | -1.64 | -7.25 | -1.83 | C | 0.02  | 2.33  | -7.13 |
| C | 0.85  | -7.22 | 2.34  | C | -0.34 | -7.25 | 3.09  | C | 0.23  | 4.77  | -5.67 |
| C | 0.71  | -6.41 | 5.23  | C | -1.50 | -7.72 | 2.43  | C | -1.00 | 4.07  | -5.76 |
| C | 1.08  | -2.53 | 7.00  | C | -0.31 | -4.50 | 6.38  | C | -0.01 | 0.90  | -7.52 |
| C | 0.76  | -5.41 | 6.21  | C | -0.41 | -6.54 | 4.38  | C | -1.21 | 0.24  | -7.86 |
| C | 1.17  | -1.17 | 7.31  | C | -1.53 | -5.73 | 4.66  | C | -1.10 | 2.88  | -6.47 |
| C | 1.25  | 1.79  | 7.82  | C | -0.15 | -3.21 | 7.09  | C | -0.22 | -1.94 | -7.37 |
| C | 1.63  | 5.05  | 5.09  | C | -1.24 | -2.52 | 7.65  | C | -1.31 | -1.15 | -7.78 |
| C | 1.35  | 3.10  | 7.36  | C | -1.48 | -4.74 | 5.64  | H | 1.58  | -4.05 | -7.24 |
| C | 1.69  | 5.90  | 3.99  | C | 0.04  | -0.44 | 7.72  | H | 1.45  | -5.95 | -5.73 |
| C | 1.66  | 7.59  | 1.50  | C | -1.14 | -1.17 | 7.97  | H | 1.63  | -6.61 | -3.77 |
| C | 1.66  | 6.44  | -2.62 | C | 0.27  | 3.72  | 6.71  | H | 1.78  | -7.28 | 0.43  |
| C | 1.66  | 7.70  | 0.11  | C | 0.07  | 1.04  | 7.65  | H | 1.73  | -7.61 | -1.57 |
| C | 1.59  | 5.79  | -3.85 | C | -1.06 | 1.72  | 7.14  | H | 1.77  | -6.88 | 2.82  |
| C | 1.30  | 4.29  | -6.45 | C | 0.44  | 4.92  | 5.84  | H | 1.57  | -7.06 | 5.10  |
| C | 1.12  | 0.09  | -7.30 | C | -0.62 | 5.79  | 5.54  | H | 1.95  | -3.03 | 6.57  |
| C | 1.20  | 3.10  | -7.17 | C | -0.96 | 3.03  | 6.68  | H | 1.66  | -5.31 | 6.81  |
| C | 1.02  | -1.29 | -7.23 | C | 0.56  | 6.65  | 3.59  | H | 2.11  | -0.65 | 7.11  |
| C | -0.40 | -3.30 | -6.82 | C | -0.56 | 6.64  | 4.44  | H | 2.12  | 1.32  | 8.28  |
| C | -1.60 | -3.62 | -6.15 | C | 0.49  | 7.41  | -0.64 | H | 2.47  | 4.40  | 5.30  |
| C | -0.56 | -5.53 | -5.02 | C | 0.51  | 7.19  | 2.21  | H | 2.29  | 3.63  | 7.47  |
| C | -1.68 | -4.70 | -5.28 | C | -0.69 | 7.07  | 1.47  | H | 2.57  | 5.89  | 3.36  |
| C | -0.41 | -7.52 | -1.19 | C | 0.54  | 7.11  | -2.08 | H | 2.59  | 7.77  | 2.04  |

|   |       |       |       |   |       |       |       |   |       |       |       |
|---|-------|-------|-------|---|-------|-------|-------|---|-------|-------|-------|
| H | 2.55  | 6.32  | -2.01 | H | -1.42 | 7.27  | 4.20  | C | -1.60 | -2.86 | -2.66 |
| H | 2.58  | 7.96  | -0.40 | H | -1.60 | 6.76  | 1.98  | C | -1.62 | -3.66 | -1.48 |
| H | 2.44  | 5.18  | -4.17 | H | -1.45 | 7.81  | -2.57 | C | -0.28 | -4.09 | -1.21 |
| H | 2.24  | 4.84  | -6.47 | H | -1.61 | 6.96  | -0.46 | C | 0.56  | -3.56 | -2.24 |
| H | 2.07  | 0.56  | -7.04 | H | -1.57 | 6.66  | -4.74 | C | 1.91  | -3.28 | -2.03 |
| H | 2.06  | 2.74  | -7.73 | H | -1.85 | 4.40  | -5.17 | C | 2.47  | -2.32 | -2.95 |
| H | 1.89  | -1.86 | -6.91 | H | -2.09 | 0.82  | -8.12 | C | 1.68  | -1.57 | -3.82 |
| H | -2.45 | -2.94 | -6.21 | H | -2.02 | 2.31  | -6.42 | C | 0.24  | -1.73 | -3.86 |
| H | -2.59 | -4.83 | -4.70 | H | -2.27 | -1.62 | -7.99 | C | -0.25 | -2.80 | -3.13 |
| H | -2.68 | -6.49 | -3.53 | C | -0.85 | -4.37 | 1.10  | H | -0.58 | -4.63 | 2.11  |
| H | -2.42 | -8.27 | 0.58  | C | -2.15 | -3.96 | 0.84  | H | -2.86 | -3.91 | 1.67  |
| H | -2.57 | -7.36 | -1.28 | C | -2.56 | -3.47 | -0.47 | H | -4.46 | -2.43 | -0.10 |
| H | -2.42 | -7.85 | 2.98  | C | -3.65 | -2.58 | -0.81 | H | -4.43 | -1.08 | -2.12 |
| H | -2.41 | -5.80 | 4.03  | C | -3.63 | -1.81 | -1.97 | H | 2.06  | -4.51 | 1.19  |
| H | -2.18 | -3.04 | 7.81  | C | 0.18  | -4.34 | 0.07  | H | 3.50  | -3.64 | -0.56 |
| H | -2.33 | -4.06 | 5.74  | C | 1.61  | -4.27 | 0.23  | H | -0.47 | 0.05  | -4.94 |
| H | -2.02 | -0.65 | 8.36  | C | 2.44  | -3.77 | -0.77 | H | -2.77 | -0.05 | -4.14 |
| H | -1.99 | 1.18  | 6.99  | C | -0.77 | -0.78 | -4.30 | H | 3.54  | -2.09 | -2.89 |
| H | -1.53 | 5.77  | 6.15  | C | -2.08 | -0.84 | -3.85 | H | 2.14  | -0.79 | -4.41 |
| H | -1.82 | 3.48  | 6.19  | C | -2.52 | -1.85 | -2.90 |   |       |       |       |

### SUMC[11]CPP-lying

|   |      |       |       |   |       |       |       |   |       |       |       |
|---|------|-------|-------|---|-------|-------|-------|---|-------|-------|-------|
| C | 0.67 | -3.59 | -7.22 | C | -0.27 | -2.55 | -7.19 | C | -0.99 | 1.43  | 7.08  |
| C | 0.58 | -4.67 | -6.33 | C | -1.38 | -2.69 | -6.33 | C | 0.49  | 4.55  | 5.60  |
| C | 0.81 | -6.11 | -3.70 | C | -0.46 | -4.74 | -5.38 | C | -0.57 | 5.39  | 5.22  |
| C | 1.01 | -6.75 | 0.51  | C | -1.47 | -3.75 | -5.44 | C | -0.90 | 2.71  | 6.53  |
| C | 0.89 | -6.71 | -2.45 | C | -0.25 | -6.87 | -1.64 | C | 0.68  | 6.20  | 3.29  |
| C | 1.03 | -6.66 | 1.90  | C | -0.42 | -5.67 | -4.23 | C | -0.48 | 6.20  | 4.09  |
| C | 0.92 | -6.35 | 4.89  | C | -1.58 | -5.98 | -3.49 | C | 0.80  | 7.28  | -0.88 |
| C | 1.23 | -2.73 | 7.05  | C | -0.15 | -7.12 | -0.19 | C | 0.69  | 6.78  | 1.92  |
| C | 0.95 | -5.50 | 5.99  | C | -1.26 | -7.55 | 0.59  | C | -0.47 | 6.71  | 1.13  |
| C | 1.30 | -1.38 | 7.39  | C | -1.50 | -6.55 | -2.22 | C | 0.89  | 7.19  | -2.35 |
| C | 1.30 | 1.58  | 7.80  | C | -0.13 | -6.92 | 2.66  | C | -0.19 | 7.50  | -3.19 |
| C | 1.70 | 4.66  | 4.87  | C | -1.25 | -7.44 | 1.97  | C | -0.41 | 6.95  | -0.24 |
| C | 1.39 | 2.86  | 7.25  | C | -0.15 | -4.66 | 6.28  | C | 0.81  | 6.25  | -5.03 |
| C | 1.79 | 5.47  | 3.74  | C | -0.21 | -6.41 | 4.04  | C | -0.23 | 7.05  | -4.51 |
| C | 1.88 | 7.23  | 1.31  | C | -1.36 | -5.71 | 4.45  | C | 0.34  | 3.02  | -7.78 |
| C | 2.01 | 6.55  | -2.93 | C | 0.00  | -3.43 | 7.09  | C | 0.61  | 5.38  | -6.21 |
| C | 1.93 | 7.48  | -0.06 | C | -1.10 | -2.76 | 7.67  | C | -0.65 | 4.77  | -6.39 |
| C | 1.96 | 6.09  | -4.24 | C | -1.33 | -4.85 | 5.54  | C | 0.27  | 1.58  | -8.13 |
| C | 1.69 | 4.89  | -6.99 | C | 0.14  | -0.67 | 7.78  | C | -0.95 | 0.94  | -8.45 |
| C | 1.38 | 0.75  | -7.85 | C | -1.03 | -1.41 | 8.00  | C | -0.78 | 3.61  | -7.16 |
| C | 1.55 | 3.74  | -7.76 | C | 0.31  | 3.42  | 6.53  | C | -0.04 | -1.23 | -7.82 |
| C | 1.22 | -0.63 | -7.70 | C | 0.14  | 0.80  | 7.65  | C | -1.10 | -0.43 | -8.29 |

|   |       |       |       |   |       |       |       |   |       |       |       |
|---|-------|-------|-------|---|-------|-------|-------|---|-------|-------|-------|
| H | 1.51  | -3.54 | -7.91 | H | -2.41 | -6.67 | -1.65 | C | -0.59 | -0.79 | -2.00 |
| H | 1.34  | -5.44 | -6.36 | H | -2.14 | -7.72 | 2.53  | C | -1.23 | -0.54 | -0.78 |
| H | 1.73  | -5.92 | -4.25 | H | -2.25 | -5.73 | 3.82  | C | -1.34 | -1.53 | 0.21  |
| H | 1.89  | -6.41 | -0.03 | H | -2.04 | -3.29 | 7.79  | C | -1.33 | -1.16 | 1.60  |
| H | 1.87  | -7.00 | -2.07 | H | -2.19 | -4.22 | 5.73  | C | -0.80 | -2.20 | 2.38  |
| H | 1.91  | -6.26 | 2.40  | H | -1.92 | -0.92 | 8.38  | C | -0.26 | -1.83 | 3.63  |
| H | 1.80  | -6.94 | 4.65  | H | -1.91 | 0.86  | 6.93  | C | -0.31 | -3.13 | -1.24 |
| H | 2.10  | -3.20 | 6.62  | H | -1.50 | 5.38  | 5.79  | C | -0.82 | -2.82 | 0.03  |
| H | 1.85  | -5.44 | 6.59  | H | -1.76 | 3.11  | 5.99  | C | -0.63 | -3.43 | 1.45  |
| H | 2.22  | -0.84 | 7.21  | H | -1.34 | 6.81  | 3.80  | C | -0.12 | 2.06  | 2.95  |
| H | 2.17  | 1.16  | 8.31  | H | -1.40 | 6.35  | 1.56  | C | -0.34 | 2.29  | 1.43  |
| H | 2.54  | 4.02  | 5.13  | H | -1.04 | 8.06  | -2.79 | C | 0.27  | 3.10  | 0.46  |
| H | 2.32  | 3.41  | 7.34  | H | -1.30 | 6.78  | -0.85 | C | 0.26  | 2.73  | -0.93 |
| H | 2.70  | 5.44  | 3.15  | H | -1.11 | 7.26  | -5.12 | H | 0.40  | -0.23 | 4.92  |
| H | 2.77  | 7.37  | 1.91  | H | -1.50 | 5.12  | -5.82 | H | -0.78 | 0.89  | -3.44 |
| H | 2.86  | 6.29  | -2.31 | H | -1.80 | 1.54  | -8.76 | H | 0.88  | 0.59  | -2.92 |
| H | 2.87  | 7.79  | -0.51 | H | -1.73 | 3.09  | -7.16 | H | 0.32  | -2.38 | -3.17 |
| H | 2.79  | 5.48  | -4.62 | H | -2.08 | -0.88 | -8.47 | H | 0.19  | -2.57 | 4.28  |
| H | 2.65  | 5.39  | -6.94 | C | -0.13 | -0.45 | 4.00  | H | 0.12  | -4.10 | -1.45 |
| H | 2.34  | 1.20  | -7.60 | C | -0.54 | 0.58  | 3.14  | H | 0.35  | -3.89 | 1.56  |
| H | 2.42  | 3.36  | -8.30 | C | -1.20 | 0.18  | 1.96  | H | -1.36 | -4.22 | 1.67  |
| H | 2.07  | -1.22 | -7.35 | C | -1.08 | 1.20  | 0.95  | H | -0.72 | 2.75  | 3.56  |
| H | -2.12 | -1.90 | -6.28 | C | -1.09 | 0.84  | -0.40 | H | 0.92  | 2.23  | 3.23  |
| H | -2.27 | -3.76 | -4.71 | C | -0.36 | 1.55  | -1.37 | H | 0.88  | 3.96  | 0.75  |
| H | -2.56 | -5.71 | -3.88 | C | -0.16 | 0.59  | -2.58 | H | 0.87  | 3.33  | -1.62 |
| H | -2.15 | -7.92 | 0.09  | C | -0.20 | -2.11 | -2.25 |   |       |       |       |

### SUMC[11]CPP-stand

|   |      |       |       |   |       |       |       |   |       |       |      |
|---|------|-------|-------|---|-------|-------|-------|---|-------|-------|------|
| C | 1.07 | -3.77 | -6.21 | C | 1.87  | 7.96  | 0.14  | C | -0.42 | -7.15 | 2.71 |
| C | 0.98 | -4.92 | -5.44 | C | 1.68  | 6.03  | -3.80 | C | -1.60 | -7.61 | 2.09 |
| C | 0.66 | -7.29 | -3.65 | C | 1.25  | 4.47  | -6.39 | C | -0.21 | -4.41 | 6.00 |
| C | 0.73 | -7.42 | 0.58  | C | 1.18  | 0.28  | -7.46 | C | -0.42 | -6.45 | 4.01 |
| C | 0.60 | -7.81 | -2.36 | C | 1.13  | 3.27  | -7.08 | C | -1.54 | -5.66 | 4.38 |
| C | 0.76 | -7.14 | 1.94  | C | 1.17  | -1.11 | -7.49 | C | -0.01 | -3.12 | 6.70 |
| C | 0.75 | -6.30 | 4.79  | C | -0.04 | -3.26 | -6.91 | C | -1.06 | -2.43 | 7.34 |
| C | 1.22 | -2.45 | 6.57  | C | -1.21 | -4.05 | -6.92 | C | -1.43 | -4.66 | 5.34 |
| C | 0.85 | -5.30 | 5.76  | C | -0.24 | -5.62 | -5.32 | C | 0.26  | -0.37 | 7.42 |
| C | 1.35 | -1.11 | 6.92  | C | -1.31 | -5.20 | -6.14 | C | -0.93 | -1.09 | 7.69 |
| C | 1.53 | 1.81  | 7.61  | C | -0.54 | -7.62 | -1.55 | C | 0.57  | 3.83  | 6.63 |
| C | 1.92 | 5.21  | 5.05  | C | -0.42 | -6.55 | -4.19 | C | 0.32  | 1.11  | 7.42 |
| C | 1.65 | 3.15  | 7.22  | C | -1.62 | -6.54 | -3.45 | C | -0.80 | 1.84  | 6.99 |
| C | 1.97 | 6.10  | 3.98  | C | -0.48 | -7.73 | -0.08 | C | 0.75  | 5.06  | 5.82 |
| C | 1.91 | 7.84  | 1.53  | C | -1.63 | -7.90 | 0.73  | C | -0.30 | 5.98  | 5.59 |
| C | 1.79 | 6.71  | -2.59 | C | -1.68 | -7.06 | -2.16 | C | -0.68 | 3.18  | 6.60 |

|   |       |       |       |   |       |       |       |   |       |       |       |
|---|-------|-------|-------|---|-------|-------|-------|---|-------|-------|-------|
| C | 0.86  | 6.88  | 3.63  | H | 2.85  | 8.00  | 2.05  | C | 0.54  | -3.43 | -2.30 |
| C | -0.25 | 6.87  | 4.52  | H | 2.71  | 6.62  | -2.02 | C | 0.50  | -4.02 | -0.98 |
| C | 0.68  | 7.69  | -0.57 | H | 2.78  | 8.21  | -0.40 | C | -0.72 | -4.29 | -0.38 |
| C | 0.77  | 7.45  | 2.27  | H | 2.52  | 5.43  | -4.15 | C | -0.91 | -4.19 | 1.01  |
| C | -0.45 | 7.35  | 1.56  | H | 2.15  | 5.06  | -6.51 | C | -2.44 | -4.04 | 1.25  |
| C | 0.68  | 7.37  | -2.02 | H | 2.13  | 0.79  | -7.45 | C | -4.05 | -2.94 | -0.65 |
| C | -0.49 | 7.46  | -2.81 | H | 1.94  | 2.95  | -7.73 | C | -2.98 | -3.71 | -0.17 |
| C | -0.49 | 7.47  | 0.18  | H | 2.12  | -1.64 | -7.53 | C | -1.95 | -4.00 | -1.08 |
| C | 0.46  | 5.97  | -4.49 | H | -2.07 | -3.74 | -7.51 | C | -1.91 | -3.44 | -2.36 |
| C | -0.60 | 6.77  | -4.01 | H | -2.25 | -5.75 | -6.13 | C | -0.64 | -3.14 | -2.97 |
| C | 0.00  | 2.43  | -6.91 | H | -2.47 | -5.98 | -3.83 | C | -0.76 | -2.04 | -3.83 |
| C | 0.24  | 4.91  | -5.51 | H | -2.57 | -8.20 | 0.27  | C | 0.40  | -1.30 | -4.08 |
| C | -0.94 | 4.15  | -5.44 | H | -2.57 | -6.89 | -1.57 | C | -4.00 | -2.36 | -1.97 |
| C | -0.02 | 1.01  | -7.33 | H | -2.52 | -7.70 | 2.67  | C | -2.90 | -2.55 | -2.81 |
| C | -1.23 | 0.28  | -7.41 | H | -2.46 | -5.75 | 3.82  | C | -2.28 | -1.73 | -3.97 |
| C | -1.06 | 2.94  | -6.12 | H | -2.00 | -2.94 | 7.53  | C | 2.58  | -2.87 | -1.20 |
| C | -0.03 | -1.85 | -7.36 | H | -2.28 | -4.00 | 5.51  | C | 1.62  | -3.61 | -0.23 |
| C | -1.23 | -1.11 | -7.41 | H | -1.77 | -0.57 | 8.14  | C | 1.48  | -3.62 | 1.16  |
| H | 1.99  | -3.19 | -6.15 | H | -1.75 | 1.34  | 6.84  | C | 0.22  | -3.91 | 1.78  |
| H | 1.82  | -5.20 | -4.81 | H | -1.19 | 5.95  | 6.21  | H | 2.45  | -0.91 | -3.53 |
| H | 1.58  | -7.39 | -4.22 | H | -1.54 | 3.67  | 6.16  | H | -2.87 | -4.97 | 1.64  |
| H | 1.63  | -7.26 | 0.00  | H | -1.10 | 7.52  | 4.33  | H | -2.67 | -3.25 | 1.97  |
| H | 1.47  | -8.32 | -1.95 | H | -1.35 | 7.06  | 2.09  | H | -4.86 | -2.64 | 0.01  |
| H | 1.68  | -6.78 | 2.38  | H | -1.34 | 8.03  | -2.44 | H | 0.37  | -0.41 | -4.71 |
| H | 1.60  | -6.94 | 4.60  | H | -1.43 | 7.26  | -0.33 | H | -4.79 | -1.65 | -2.23 |
| H | 2.06  | -2.94 | 6.08  | H | -1.54 | 6.81  | -4.57 | H | -2.49 | -0.66 | -3.88 |
| H | 1.79  | -5.19 | 6.30  | H | -1.74 | 4.45  | -4.77 | H | -2.66 | -2.05 | -4.95 |
| H | 2.29  | -0.59 | 6.69  | H | -2.18 | 0.81  | -7.40 | H | 3.47  | -3.48 | -1.44 |
| H | 2.39  | 1.30  | 8.01  | H | -1.94 | 2.33  | -5.95 | H | 2.94  | -1.93 | -0.77 |
| H | 2.76  | 4.53  | 5.21  | H | -2.19 | -1.62 | -7.36 | H | 2.29  | -3.28 | 1.81  |
| H | 2.61  | 3.64  | 7.33  | C | 1.62  | -1.59 | -3.40 | H | 0.14  | -3.78 | 2.86  |
| H | 2.85  | 6.09  | 3.33  | C | 1.69  | -2.63 | -2.45 |   |       |       |       |

## [12]CPP

|   |       |       |       |   |       |       |       |   |      |       |       |
|---|-------|-------|-------|---|-------|-------|-------|---|------|-------|-------|
| C | 7.67  | -3.03 | -3.78 | C | -6.69 | -3.66 | -3.73 | C | 6.63 | 4.84  | -3.76 |
| C | 5.56  | -6.88 | -3.90 | C | -8.29 | 0.32  | -3.83 | C | 8.92 | 1.08  | -3.89 |
| C | 7.03  | -4.26 | -3.78 | C | -6.98 | 3.03  | -3.70 | C | 7.38 | 3.66  | -3.76 |
| C | 4.39  | -7.63 | -3.90 | C | -4.87 | 6.89  | -3.82 | C | 8.98 | -0.32 | -3.90 |
| C | 1.39  | -7.86 | -3.77 | C | -6.34 | 4.26  | -3.70 | C | 8.58 | -1.06 | -5.02 |
| C | -3.01 | -7.96 | -3.87 | C | -3.69 | 7.63  | -3.82 | C | 6.94 | -5.04 | -4.95 |
| C | 0.00  | -7.92 | -3.76 | C | -0.69 | 7.86  | -3.72 | C | 8.26 | -2.51 | -4.95 |
| C | -4.25 | -7.32 | -3.87 | C | 3.70  | 7.96  | -3.86 | C | 8.30 | -3.35 | -6.08 |
| C | -5.94 | -4.83 | -3.73 | C | 0.70  | 7.92  | -3.72 | C | 5.94 | -6.13 | -5.03 |
| C | -8.22 | -1.07 | -3.83 | C | 4.94  | 7.32  | -3.86 | C | 5.17 | -6.28 | -6.20 |

|   |       |       |       |   |       |       |       |   |       |       |       |
|---|-------|-------|-------|---|-------|-------|-------|---|-------|-------|-------|
| C | 7.66  | -4.59 | -6.08 | C | 2.85  | 7.92  | -4.98 | H | 8.50  | 3.76  | -6.97 |
| C | 3.54  | -7.66 | -5.02 | C | 3.36  | 7.34  | -6.16 | H | 7.18  | 5.83  | -6.96 |
| C | 4.00  | -7.03 | -6.20 | C | 0.66  | 8.64  | -6.02 | H | 4.91  | 6.15  | -7.06 |
| C | -0.72 | -8.23 | -4.93 | C | 5.38  | 6.60  | -5.00 | H | 2.74  | 7.28  | -7.05 |
| C | 2.13  | -8.10 | -4.94 | C | 4.60  | 6.69  | -6.17 | H | 1.17  | 8.96  | -6.93 |
| C | 1.41  | -8.56 | -6.07 | C | 8.01  | 3.20  | -4.94 | H | -1.28 | 8.85  | -6.92 |
| C | -2.17 | -7.91 | -5.01 | C | 6.47  | 5.60  | -4.93 | H | 3.37  | 8.47  | -2.95 |
| C | -2.69 | -7.32 | -6.17 | C | 7.22  | 5.22  | -6.06 | H | 1.24  | 7.61  | -2.84 |
| C | 0.02  | -8.63 | -6.07 | C | 8.45  | 1.79  | -5.02 | H | -1.20 | 7.50  | -2.82 |
| C | -4.70 | -6.59 | -4.99 | C | 8.20  | 1.05  | -6.19 | H | -3.40 | 8.17  | -2.92 |
| C | -3.92 | -6.68 | -6.17 | C | 7.97  | 4.05  | -6.06 | H | -5.47 | 6.85  | -2.92 |
| C | -7.32 | -3.19 | -4.90 | C | 8.26  | -0.34 | -6.20 | H | -5.79 | 4.57  | -2.81 |
| C | -5.79 | -5.60 | -4.91 | H | 1.95  | -8.83 | -6.97 | H | -6.92 | 2.40  | -2.82 |
| C | -6.55 | -5.21 | -6.03 | H | -0.50 | -8.94 | -6.97 | H | -8.60 | 0.83  | -2.92 |
| C | -7.77 | -1.78 | -4.97 | H | -2.07 | -7.26 | -7.07 | H | 4.10  | -8.17 | -2.99 |
| C | -7.52 | -1.03 | -6.14 | H | -4.24 | -6.13 | -7.06 | H | -6.69 | -3.04 | -2.83 |
| C | -7.29 | -4.03 | -6.03 | H | -6.51 | -5.81 | -6.94 | H | -5.37 | -5.10 | -2.84 |
| C | -7.89 | 1.07  | -4.96 | H | -7.83 | -3.74 | -6.93 | H | -4.85 | -7.34 | -2.96 |
| C | -7.58 | 0.36  | -6.13 | H | -7.17 | -1.54 | -7.03 | H | 5.55  | 7.33  | -2.96 |
| C | -6.26 | 5.04  | -4.87 | H | -7.28 | 0.90  | -7.02 | H | 6.07  | 5.10  | -2.86 |
| C | -7.57 | 2.51  | -4.88 | H | -8.13 | 3.03  | -6.90 | H | 7.39  | 3.04  | -2.87 |
| C | -7.62 | 3.36  | -6.00 | H | -7.00 | 5.21  | -6.90 | H | 9.19  | 1.62  | -2.99 |
| C | -5.26 | 6.13  | -4.95 | H | -4.76 | 5.73  | -7.02 | H | 9.30  | -0.83 | -3.00 |
| C | -4.50 | 6.29  | -6.13 | H | -2.70 | 7.05  | -7.03 | H | 7.62  | -2.41 | -2.88 |
| C | -6.98 | 4.60  | -6.00 | H | 3.37  | -7.03 | -7.08 | H | 6.49  | -4.57 | -2.88 |
| C | -2.85 | 7.67  | -4.96 | H | 5.43  | -5.71 | -7.09 | H | 6.17  | -6.85 | -3.00 |
| C | -3.32 | 7.04  | -6.13 | H | 7.67  | -5.19 | -6.98 | H | 1.90  | -7.50 | -2.88 |
| C | 1.41  | 8.24  | -4.90 | H | 8.80  | -3.01 | -6.98 | H | -0.54 | -7.61 | -2.87 |
| C | -1.44 | 8.11  | -4.89 | H | 7.94  | -0.88 | -7.09 | H | -2.67 | -8.47 | -2.97 |
| C | -0.74 | 8.58  | -6.02 | H | 7.84  | 1.56  | -7.08 | H | -8.49 | -1.62 | -2.93 |

### CORC[12]CPP-lying

|   |       |       |      |   |       |       |      |   |       |       |       |
|---|-------|-------|------|---|-------|-------|------|---|-------|-------|-------|
| C | 7.50  | -3.76 | 0.96 | C | -7.20 | 3.06  | 1.19 | C | 8.08  | -1.66 | -0.25 |
| C | 5.84  | -7.81 | 0.75 | C | -5.49 | 7.08  | 1.06 | C | 7.06  | -5.82 | -0.26 |
| C | 7.05  | -5.07 | 0.94 | C | -6.75 | 4.38  | 1.19 | C | 7.99  | -3.13 | -0.20 |
| C | 4.69  | -8.59 | 0.75 | C | -4.34 | 7.86  | 1.06 | C | 8.16  | -3.94 | -1.35 |
| C | 1.70  | -8.70 | 0.95 | C | -1.37 | 8.01  | 1.19 | C | 6.17  | -7.00 | -0.36 |
| C | -2.66 | -8.26 | 0.91 | C | 2.98  | 7.53  | 1.07 | C | 5.41  | -7.18 | -1.54 |
| C | 0.31  | -8.62 | 0.98 | C | 0.02  | 7.95  | 1.20 | C | 7.70  | -5.26 | -1.37 |
| C | -3.80 | -7.46 | 0.93 | C | 4.12  | 6.72  | 1.04 | C | 3.82  | -8.61 | -0.36 |
| C | -5.23 | -4.81 | 1.04 | C | 5.55  | 4.09  | 1.05 | C | 4.26  | -7.96 | -1.53 |
| C | -7.73 | -1.18 | 1.05 | C | 8.10  | 0.49  | 0.91 | C | -0.45 | -8.84 | -0.18 |
| C | -5.96 | -3.62 | 1.06 | C | 6.30  | 2.91  | 1.02 | C | 2.39  | -8.99 | -0.24 |
| C | -7.99 | 0.18  | 1.07 | C | 8.36  | -0.88 | 0.89 | C | 1.62  | -9.38 | -1.36 |



|   |       |       |       |   |       |       |       |   |       |       |       |
|---|-------|-------|-------|---|-------|-------|-------|---|-------|-------|-------|
| C | -1.84 | -8.33 | -0.24 | H | 6.56  | -5.47 | 1.82  | H | -1.84 | 9.02  | -2.02 |
| C | -2.30 | -7.68 | -1.40 | H | 4.43  | -9.14 | 1.65  | H | 1.99  | 7.13  | -2.16 |
| C | 0.23  | -9.31 | -1.33 | H | 2.26  | -8.40 | 1.84  | H | 0.61  | 8.90  | -2.01 |
| C | -4.18 | -6.70 | -0.20 | H | -2.38 | -8.81 | 1.81  | H | 3.99  | 5.73  | -2.21 |
| C | -3.44 | -6.89 | -1.38 | H | -0.17 | -8.27 | 1.89  | H | 6.26  | 5.22  | -2.08 |
| C | -6.68 | -3.19 | -0.07 | H | -4.39 | -7.40 | 1.84  | H | 6.99  | 0.87  | -2.28 |
| C | -5.17 | -5.61 | -0.11 | H | -4.62 | -5.07 | 1.90  | H | 7.57  | 3.14  | -2.12 |
| C | -5.96 | -5.22 | -1.22 | H | -7.89 | -1.77 | 1.95  | H | 7.43  | -1.54 | -2.31 |
| C | -7.23 | -1.82 | -0.11 | H | -5.91 | -2.98 | 1.94  | C | 2.18  | 0.41  | 0.60  |
| C | -7.12 | -1.04 | -1.28 | H | -8.35 | 0.64  | 1.98  | C | 2.36  | 1.79  | 0.52  |
| C | -6.70 | -4.04 | -1.20 | H | -7.05 | 2.46  | 2.08  | C | 1.27  | 2.71  | 0.79  |
| C | -7.76 | 0.98  | -0.07 | H | -6.07 | 7.00  | 1.98  | C | 1.10  | 4.07  | 0.31  |
| C | -7.38 | 0.33  | -1.26 | H | -6.26 | 4.76  | 2.08  | C | -0.17 | 4.65  | 0.21  |
| C | -6.76 | 5.16  | 0.01  | H | -4.04 | 8.37  | 1.98  | C | 0.91  | -0.18 | 0.97  |
| C | -7.68 | 2.46  | 0.01  | H | -1.90 | 7.70  | 2.08  | C | 0.39  | -1.50 | 0.66  |
| C | -7.84 | 3.29  | -1.12 | H | 2.71  | 8.03  | 1.99  | C | -0.98 | -1.76 | 0.63  |
| C | -5.87 | 6.34  | -0.07 | H | 0.53  | 7.58  | 2.09  | C | -3.68 | 3.14  | 0.18  |
| C | -5.15 | 6.57  | -1.26 | H | 4.71  | 6.61  | 1.95  | C | -2.73 | 4.16  | 0.15  |
| C | -7.40 | 4.61  | -1.12 | H | 4.95  | 4.31  | 1.92  | C | -1.37 | 3.94  | 0.60  |
| C | -3.51 | 7.93  | -0.07 | H | 8.30  | 1.06  | 1.82  | C | -1.15 | 2.74  | 1.26  |
| C | -4.00 | 7.35  | -1.26 | H | 6.26  | 2.24  | 1.88  | C | 0.14  | 2.14  | 1.35  |
| C | 0.77  | 8.17  | 0.02  | H | 8.75  | -1.36 | 1.78  | C | -0.04 | 0.72  | 1.44  |
| C | -2.08 | 8.31  | 0.02  | H | 8.61  | -3.52 | -2.24 | C | -1.44 | 0.45  | 1.41  |
| C | -1.33 | 8.71  | -1.11 | H | 5.64  | -6.59 | -2.42 | C | -1.97 | -0.74 | 0.91  |
| C | 2.15  | 7.66  | -0.07 | H | 7.80  | -5.83 | -2.29 | C | -3.35 | -0.66 | 0.49  |
| C | 2.60  | 7.06  | -1.27 | H | 3.62  | -7.96 | -2.41 | C | -4.02 | 0.55  | 0.37  |
| C | 0.06  | 8.64  | -1.11 | H | 2.11  | -9.69 | -2.27 | C | -3.37 | 1.81  | 0.67  |
| C | 4.48  | 6.02  | -0.12 | H | -1.69 | -7.71 | -2.30 | C | -2.13 | 1.70  | 1.30  |
| C | 3.74  | 6.26  | -1.29 | H | -0.34 | -9.56 | -2.22 | H | 2.99  | -0.24 | 0.29  |
| C | 7.00  | 2.51  | -0.13 | H | -3.70 | -6.32 | -2.27 | H | 3.30  | 2.17  | 0.15  |
| C | 5.48  | 4.92  | -0.09 | H | -5.99 | -5.85 | -2.11 | H | 1.95  | 4.61  | -0.08 |
| C | 6.25  | 4.57  | -1.21 | H | -6.73 | -1.49 | -2.19 | H | -0.25 | 5.63  | -0.26 |
| C | 7.56  | 1.15  | -0.22 | H | -7.28 | -3.76 | -2.07 | H | 1.07  | -2.28 | 0.34  |
| C | 7.41  | 0.39  | -1.40 | H | -7.18 | 0.91  | -2.16 | H | -1.32 | -2.74 | 0.29  |
| C | 7.00  | 3.39  | -1.23 | H | -8.29 | 2.88  | -2.03 | H | -4.66 | 3.33  | -0.26 |
| C | 7.66  | -0.97 | -1.42 | H | -5.41 | 6.03  | -2.17 | H | -3.00 | 5.10  | -0.32 |
| H | 7.36  | -3.17 | 1.87  | H | -7.49 | 5.20  | -2.02 | H | -3.86 | -1.57 | 0.15  |
| H | 6.46  | -7.76 | 1.65  | H | -3.39 | 7.39  | -2.17 | H | -5.03 | 0.56  | -0.04 |

#### CORC[12]CPP-stand

|   |      |       |      |   |       |       |      |   |       |       |      |
|---|------|-------|------|---|-------|-------|------|---|-------|-------|------|
| C | 7.37 | -2.92 | 1.25 | C | 0.84  | -7.43 | 1.19 | C | -6.60 | -4.68 | 1.15 |
| C | 5.06 | -6.65 | 1.12 | C | -3.54 | -7.63 | 1.09 | C | -8.86 | -0.93 | 0.99 |
| C | 6.66 | -4.12 | 1.25 | C | -0.55 | -7.49 | 1.19 | C | -7.36 | -3.51 | 1.13 |
| C | 3.85 | -7.34 | 1.11 | C | -4.81 | -7.05 | 1.08 | C | -8.92 | 0.46  | 0.98 |

|   |       |       |       |   |       |       |       |   |       |       |       |
|---|-------|-------|-------|---|-------|-------|-------|---|-------|-------|-------|
| C | -7.65 | 3.16  | 1.11  | C | -3.64 | 6.87  | -1.24 | H | 1.44  | -8.54 | -1.97 |
| C | -5.27 | 6.84  | 1.01  | C | 1.09  | 8.08  | 0.06  | H | -2.69 | -7.10 | -2.15 |
| C | -6.96 | 4.36  | 1.12  | C | -1.76 | 7.92  | 0.02  | H | -1.02 | -8.66 | -1.98 |
| C | -4.05 | 7.52  | 1.04  | C | -1.04 | 8.39  | -1.09 | H | -4.90 | -6.08 | -2.18 |
| C | -1.03 | 7.67  | 1.20  | C | 2.54  | 7.80  | 0.01  | H | -7.10 | -5.67 | -2.07 |
| C | 3.37  | 7.87  | 1.15  | C | 3.10  | 7.25  | -1.16 | H | -7.87 | -1.44 | -2.22 |
| C | 0.36  | 7.74  | 1.22  | C | 0.35  | 8.47  | -1.07 | H | -8.43 | -3.62 | -2.09 |
| C | 4.63  | 7.28  | 1.16  | C | 5.12  | 6.59  | 0.04  | H | -7.95 | 0.99  | -2.24 |
| C | 6.41  | 4.86  | 1.29  | C | 4.35  | 6.65  | -1.15 | H | -8.58 | 3.11  | -2.17 |
| C | 8.73  | 1.13  | 1.15  | C | 7.83  | 3.26  | 0.12  | H | -5.12 | 5.62  | -2.16 |
| C | 7.19  | 3.70  | 1.29  | C | 6.24  | 5.63  | 0.12  | H | -7.34 | 5.22  | -2.15 |
| C | 8.77  | -0.26 | 1.14  | C | 7.02  | 5.27  | -1.00 | H | -2.99 | 6.82  | -2.12 |
| C | 8.35  | -1.00 | 0.01  | C | 8.28  | 1.85  | 0.03  | H | -1.58 | 8.66  | -2.00 |
| C | 6.54  | -4.89 | 0.07  | C | 8.03  | 1.12  | -1.15 | H | 2.49  | 7.17  | -2.06 |
| C | 7.98  | -2.43 | 0.08  | C | 7.80  | 4.12  | -1.01 | H | 0.88  | 8.80  | -1.97 |
| C | 7.99  | -3.27 | -1.05 | C | 8.07  | -0.27 | -1.16 | H | 4.70  | 6.13  | -2.04 |
| C | 5.49  | -5.93 | -0.01 | H | 7.34  | -2.30 | 2.15  | H | 6.98  | 5.89  | -1.90 |
| C | 4.73  | -6.05 | -1.19 | H | 5.66  | -6.64 | 2.03  | H | 7.69  | 1.64  | -2.04 |
| C | 7.29  | -4.48 | -1.05 | H | 6.11  | -4.41 | 2.14  | H | 8.34  | 3.85  | -1.91 |
| C | 3.01  | -7.34 | -0.03 | H | 3.52  | -7.86 | 2.01  | H | 7.75  | -0.80 | -2.06 |
| C | 3.52  | -6.74 | -1.20 | H | 1.34  | -7.04 | 2.07  | C | -3.20 | -1.18 | 3.31  |
| C | -1.26 | -7.87 | 0.03  | H | -3.17 | -8.07 | 2.02  | C | -3.39 | 0.20  | 3.31  |
| C | 1.59  | -7.74 | 0.04  | H | -1.10 | -7.14 | 2.06  | C | -4.11 | 0.87  | 2.25  |
| C | 0.89  | -8.23 | -1.08 | H | -5.39 | -7.04 | 1.99  | C | -3.99 | 2.25  | 1.81  |
| C | -2.72 | -7.61 | -0.05 | H | -6.04 | -4.92 | 2.04  | C | -4.33 | 2.64  | 0.52  |
| C | -3.29 | -7.13 | -1.25 | H | -9.11 | -1.46 | 1.91  | C | -3.70 | -2.02 | 2.24  |
| C | -0.51 | -8.30 | -1.09 | H | -7.36 | -2.88 | 2.01  | C | -3.20 | -3.31 | 1.79  |
| C | -5.31 | -6.42 | -0.08 | H | -9.21 | 0.98  | 1.89  | C | -3.40 | -3.76 | 0.49  |
| C | -4.55 | -6.55 | -1.26 | H | -7.67 | 2.56  | 2.01  | C | -4.79 | 0.66  | -2.71 |
| C | -7.97 | -3.06 | -0.05 | H | -5.90 | 6.86  | 1.90  | C | -4.78 | 1.79  | -1.90 |
| C | -6.42 | -5.44 | -0.02 | H | -6.46 | 4.66  | 2.03  | C | -4.83 | 1.70  | -0.46 |
| C | -7.16 | -5.07 | -1.16 | H | -3.76 | 8.05  | 1.94  | C | -5.11 | 0.43  | 0.04  |
| C | -8.43 | -1.65 | -0.14 | H | -1.55 | 7.30  | 2.09  | C | -4.77 | 0.03  | 1.36  |
| C | -8.22 | -0.92 | -1.33 | H | 3.00  | 8.36  | 2.05  | C | -4.56 | -1.38 | 1.35  |
| C | -7.92 | -3.90 | -1.18 | H | 0.89  | 7.44  | 2.12  | C | -4.77 | -1.85 | 0.02  |
| C | -8.53 | 1.19  | -0.16 | H | 5.22  | 7.32  | 2.07  | C | -4.12 | -2.97 | -0.49 |
| C | -8.27 | 0.47  | -1.34 | H | 5.83  | 5.10  | 2.18  | C | -4.03 | -3.02 | -1.94 |
| C | -6.75 | 5.09  | -0.07 | H | 9.00  | 1.66  | 2.06  | C | -4.38 | -1.92 | -2.73 |
| C | -8.18 | 2.63  | -0.09 | H | 7.19  | 3.07  | 2.17  | C | -4.84 | -0.68 | -2.15 |
| C | -8.12 | 3.45  | -1.24 | H | 9.07  | -0.79 | 2.05  | C | -5.11 | -0.73 | -0.79 |
| C | -5.67 | 6.10  | -0.12 | H | 8.52  | -2.96 | -1.95 | H | -2.56 | -1.62 | 4.07  |
| C | -4.85 | 6.18  | -1.27 | H | 5.02  | -5.50 | -2.08 | H | -2.90 | 0.79  | 4.08  |
| C | -7.41 | 4.65  | -1.23 | H | 7.28  | -5.08 | -1.95 | H | -3.53 | 2.98  | 2.48  |
| C | -3.18 | 7.50  | -0.07 | H | 2.90  | -6.72 | -2.10 | H | -4.14 | 3.67  | 0.22  |

H -2.57 -3.89 2.45  
H -2.92 -4.68 0.18

H -4.65 0.78 -3.78  
H -4.64 2.77 -2.37

H -3.59 -3.89 -2.41  
H -4.20 -1.98 -3.80

### SUMC[12]CPP-lying

C 7.39 -3.72 1.03  
C 5.61 -7.72 0.82  
C 6.89 -5.01 1.00  
C 4.44 -8.48 0.82  
C 1.45 -8.57 1.00  
C -2.92 -8.22 0.95  
C 0.06 -8.51 1.02  
C -4.09 -7.45 0.96  
C -5.58 -4.84 1.06  
C -8.12 -1.25 1.03  
C -6.34 -3.67 1.07  
C -8.36 0.12 1.04  
C -7.48 2.98 1.15  
C -5.62 6.93 1.00  
C -6.96 4.27 1.14  
C -4.46 7.69 1.01  
C -1.48 7.84 1.17  
C 2.88 7.46 1.09  
C -0.09 7.80 1.18  
C 4.04 6.69 1.08  
C 5.54 4.09 1.11  
C 8.11 0.51 0.98  
C 6.31 2.93 1.09  
C 8.34 -0.87 0.96  
C 8.05 -1.64 -0.19  
C 6.88 -5.77 -0.19  
C 7.91 -3.11 -0.14  
C 8.06 -3.93 -1.28  
C 5.96 -6.92 -0.30  
C 5.20 -7.08 -1.47  
C 7.55 -5.23 -1.30  
C 3.58 -8.48 -0.30  
C 4.03 -7.84 -1.47  
C -0.70 -8.74 -0.14  
C 2.15 -8.86 -0.19  
C 1.39 -9.26 -1.31  
C -2.10 -8.27 -0.20  
C -2.58 -7.65 -1.37  
C -0.01 -9.20 -1.28  
C -4.49 -6.72 -0.17

C -3.74 -6.89 -1.35  
C -7.06 -3.26 -0.07  
C -5.51 -5.65 -0.09  
C -6.32 -5.30 -1.19  
C -7.63 -1.89 -0.12  
C -7.52 -1.13 -1.30  
C -7.08 -4.13 -1.18  
C -8.11 0.91 -0.11  
C -7.76 0.24 -1.29  
C -6.92 5.03 -0.05  
C -7.98 2.39 -0.03  
C -8.10 3.21 -1.17  
C -5.99 6.18 -0.13  
C -5.25 6.39 -1.31  
C -7.58 4.50 -1.18  
C -3.61 7.74 -0.12  
C -4.09 7.15 -1.31  
C 0.66 8.04 0.02  
C -2.19 8.12 -0.02  
C -1.43 8.53 -1.14  
C 2.06 7.57 -0.05  
C 2.54 6.98 -1.25  
C -0.04 8.49 -1.12  
C 4.44 5.99 -0.07  
C 3.71 6.22 -1.26  
C 7.02 2.54 -0.06  
C 5.46 4.92 -0.03  
C 6.26 4.59 -1.14  
C 7.58 1.17 -0.15  
C 7.43 0.43 -1.33  
C 7.02 3.43 -1.16  
C 7.66 -0.95 -1.35  
H 7.27 -3.12 1.93  
H 6.22 -7.68 1.72  
H 6.39 -5.40 1.88  
H 4.17 -9.03 1.71  
H 2.01 -8.26 1.88  
H -2.62 -8.75 1.85  
H -0.43 -8.16 1.92  
H -4.68 -7.40 1.88

H -4.96 -5.07 1.92  
H -8.28 -1.82 1.94  
H -6.29 -3.02 1.94  
H -8.71 0.60 1.95  
H -7.36 2.37 2.04  
H -6.22 6.87 1.91  
H -6.46 4.63 2.03  
H -4.17 8.21 1.92  
H -2.02 7.52 2.05  
H 2.58 7.96 2.01  
H 0.41 7.44 2.08  
H 4.62 6.60 2.00  
H 4.93 4.30 1.98  
H 8.30 1.06 1.89  
H 6.27 2.26 1.95  
H 8.71 -1.36 1.86  
H 8.52 -3.52 -2.17  
H 5.44 -6.50 -2.35  
H 7.64 -5.81 -2.22  
H 3.40 -7.83 -2.35  
H 1.89 -9.57 -2.22  
H -1.97 -7.66 -2.27  
H -0.56 -9.47 -2.18  
H -4.02 -6.33 -2.25  
H -6.33 -5.93 -2.08  
H -7.15 -1.60 -2.21  
H -7.67 -3.87 -2.06  
H -7.55 0.81 -2.19  
H -8.56 2.82 -2.07  
H -5.51 5.83 -2.21  
H -7.65 5.10 -2.09  
H -3.47 7.17 -2.20  
H -1.94 8.83 -2.05  
H 1.94 7.03 -2.15  
H 0.51 8.76 -2.02  
H 3.99 5.69 -2.17  
H 6.26 5.24 -2.01  
H 7.03 0.91 -2.22  
H 7.61 3.18 -2.04  
H 7.42 -1.51 -2.25

|   |       |       |      |   |       |       |      |   |       |       |       |
|---|-------|-------|------|---|-------|-------|------|---|-------|-------|-------|
| C | 1.25  | -0.99 | 0.78 | C | -1.14 | 0.08  | 1.71 | H | -3.47 | 4.92  | 0.77  |
| C | 1.24  | 0.35  | 1.19 | C | -1.18 | -1.23 | 1.19 | H | -3.08 | 4.33  | -0.84 |
| C | 0.03  | 0.84  | 1.71 | C | 0.05  | -1.78 | 0.78 | H | -5.25 | 2.28  | -0.55 |
| C | -0.04 | 2.27  | 1.56 | C | -4.41 | 0.45  | 0.26 | H | 0.09  | -2.77 | 0.33  |
| C | -1.28 | 2.89  | 1.41 | C | -3.33 | -0.15 | 0.93 | H | -5.14 | -0.15 | -0.27 |
| C | -1.45 | 4.04  | 0.62 | C | -2.66 | -1.54 | 0.85 | H | -2.76 | -1.98 | -0.15 |
| C | -2.95 | 4.12  | 0.23 | C | 2.13  | 1.58  | 0.85 | H | -3.10 | -2.26 | 1.56  |
| C | -4.47 | 1.88  | 0.09 | C | 1.12  | 2.76  | 0.94 | H | 2.96  | 1.70  | 1.56  |
| C | -3.48 | 2.72  | 0.61 | C | 1.00  | 3.99  | 0.26 | H | 2.57  | 1.50  | -0.15 |
| C | -2.49 | 2.10  | 1.41 | C | -0.28 | 4.62  | 0.10 | H | 1.85  | 4.42  | -0.27 |
| C | -2.42 | 0.72  | 1.56 | H | 2.14  | -1.43 | 0.33 | H | -0.33 | 5.49  | -0.55 |

### SUMC[12]CPP-stand

|   |       |       |       |   |       |       |       |   |       |       |       |
|---|-------|-------|-------|---|-------|-------|-------|---|-------|-------|-------|
| C | 7.65  | -2.97 | 1.16  | C | 3.27  | -7.39 | 0.01  | C | 0.37  | 8.32  | -0.96 |
| C | 5.34  | -6.71 | 1.10  | C | 3.75  | -6.80 | -1.18 | C | 5.19  | 6.47  | -0.02 |
| C | 6.96  | -4.18 | 1.18  | C | -1.01 | -7.87 | 0.16  | C | 4.39  | 6.53  | -1.18 |
| C | 4.13  | -7.39 | 1.13  | C | 1.84  | -7.78 | 0.11  | C | 7.97  | 3.20  | -0.02 |
| C | 1.12  | -7.47 | 1.28  | C | 1.11  | -8.26 | -0.99 | C | 6.34  | 5.53  | 0.03  |
| C | -3.28 | -7.64 | 1.26  | C | -2.46 | -7.60 | 0.11  | C | 7.08  | 5.19  | -1.12 |
| C | -0.27 | -7.51 | 1.30  | C | -3.05 | -7.10 | -1.08 | C | 8.45  | 1.80  | -0.12 |
| C | -4.55 | -7.08 | 1.26  | C | -0.28 | -8.31 | -0.97 | C | 8.19  | 1.06  | -1.29 |
| C | -6.43 | -4.76 | 1.35  | C | -5.08 | -6.45 | 0.11  | C | 7.88  | 4.05  | -1.14 |
| C | -8.79 | -1.09 | 1.24  | C | -4.32 | -6.55 | -1.07 | C | 8.25  | -0.33 | -1.29 |
| C | -7.23 | -3.63 | 1.35  | C | -7.87 | -3.19 | 0.17  | H | 7.64  | -2.35 | 2.05  |
| C | -8.86 | 0.30  | 1.24  | C | -6.22 | -5.52 | 0.18  | H | 5.96  | -6.70 | 2.00  |
| C | -7.53 | 2.96  | 1.36  | C | -6.98 | -5.17 | -0.96 | H | 6.43  | -4.46 | 2.08  |
| C | -5.17 | 6.64  | 1.29  | C | -8.37 | -1.80 | 0.09  | H | 3.82  | -7.90 | 2.04  |
| C | -6.84 | 4.17  | 1.37  | C | -8.19 | -1.06 | -1.09 | H | 1.65  | -7.08 | 2.15  |
| C | -3.94 | 7.31  | 1.29  | C | -7.79 | -4.03 | -0.96 | H | -2.89 | -8.08 | 2.18  |
| C | -0.94 | 7.45  | 1.33  | C | -8.50 | 1.05  | 0.10  | H | -0.79 | -7.16 | 2.19  |
| C | 3.45  | 7.72  | 1.16  | C | -8.25 | 0.33  | -1.09 | H | -5.13 | -7.09 | 2.18  |
| C | 0.45  | 7.53  | 1.31  | C | -6.70 | 4.94  | 0.20  | H | -5.85 | -4.99 | 2.24  |
| C | 4.72  | 7.15  | 1.13  | C | -8.13 | 2.47  | 0.18  | H | -9.02 | -1.63 | 2.15  |
| C | 6.56  | 4.77  | 1.20  | C | -8.12 | 3.32  | -0.95 | H | -7.25 | -3.00 | 2.23  |
| C | 8.95  | 1.09  | 0.99  | C | -5.64 | 5.97  | 0.14  | H | -9.14 | 0.81  | 2.16  |
| C | 7.36  | 3.63  | 1.17  | C | -4.89 | 6.14  | -1.05 | H | -7.50 | 2.33  | 2.24  |
| C | 9.01  | -0.30 | 0.99  | C | -7.42 | 4.53  | -0.94 | H | -5.74 | 6.59  | 2.21  |
| C | 8.58  | -1.05 | -0.13 | C | -3.13 | 7.35  | 0.14  | H | -6.28 | 4.44  | 2.27  |
| C | 6.81  | -4.95 | 0.01  | C | -3.67 | 6.81  | -1.05 | H | -3.60 | 7.78  | 2.21  |
| C | 8.23  | -2.48 | -0.03 | C | 1.14  | 7.90  | 0.14  | H | -1.43 | 7.05  | 2.22  |
| C | 8.22  | -3.34 | -1.16 | C | -1.71 | 7.74  | 0.19  | H | 3.10  | 8.19  | 2.07  |
| C | 5.75  | -5.99 | -0.04 | C | -1.03 | 8.25  | -0.94 | H | 1.01  | 7.19  | 2.18  |
| C | 4.96  | -6.12 | -1.20 | C | 2.59  | 7.64  | 0.04  | H | 5.34  | 7.19  | 2.02  |
| C | 7.52  | -4.54 | -1.14 | C | 3.12  | 7.10  | -1.15 | H | 6.00  | 5.00  | 2.10  |

|   |       |       |       |   |       |       |       |   |       |       |       |
|---|-------|-------|-------|---|-------|-------|-------|---|-------|-------|-------|
| H | 9.24  | 1.63  | 1.89  | H | 2.49  | 7.03  | -2.03 | C | -3.57 | -3.38 | 0.62  |
| H | 7.40  | 3.00  | 2.06  | H | 0.86  | 8.68  | -1.86 | C | -3.85 | -0.88 | -3.71 |
| H | 9.36  | -0.82 | 1.89  | H | 4.72  | 6.02  | -2.08 | C | -4.31 | -1.63 | -2.62 |
| H | 8.72  | -3.03 | -2.07 | H | 7.00  | 5.80  | -2.01 | C | -3.96 | -3.03 | -2.05 |
| H | 5.24  | -5.58 | -2.10 | H | 7.80  | 1.57  | -2.17 | C | -3.93 | -0.18 | 2.90  |
| H | 7.49  | -5.15 | -2.04 | H | 8.41  | 3.79  | -2.06 | C | -4.29 | 1.02  | 1.98  |
| H | 3.11  | -6.78 | -2.06 | H | 7.91  | -0.87 | -2.18 | C | -3.80 | 2.33  | 1.87  |
| H | 1.64  | -8.57 | -1.89 | C | -3.56 | -2.67 | 1.86  | C | -3.87 | 3.04  | 0.63  |
| H | -2.45 | -7.06 | -1.99 | C | -4.17 | -1.41 | 1.97  | H | -2.96 | -3.07 | 2.67  |
| H | -0.82 | -8.66 | -1.85 | C | -4.89 | -0.95 | 0.85  | H | -4.96 | 3.39  | -2.43 |
| H | -4.69 | -6.08 | -1.98 | C | -4.96 | 0.49  | 0.86  | H | -3.23 | 3.06  | -2.27 |
| H | -6.91 | -5.76 | -1.86 | C | -5.02 | 1.19  | -0.35 | H | -3.42 | 1.08  | -4.52 |
| H | -7.85 | -1.56 | -1.99 | C | -4.42 | 2.45  | -0.51 | H | -2.98 | -4.30 | 0.55  |
| H | -8.32 | -3.76 | -1.87 | C | -4.23 | 2.67  | -2.04 | H | -3.30 | -1.37 | -4.52 |
| H | -7.96 | 0.87  | -1.99 | C | -3.91 | 0.55  | -3.71 | H | -2.94 | -3.33 | -2.29 |
| H | -8.62 | 3.01  | -1.86 | C | -4.45 | 1.25  | -2.62 | H | -4.63 | -3.81 | -2.45 |
| H | -5.22 | 5.65  | -1.96 | C | -5.02 | 0.47  | -1.59 | H | -4.57 | -0.22 | 3.80  |
| H | -7.39 | 5.13  | -1.84 | C | -4.96 | -0.92 | -1.60 | H | -2.89 | -0.14 | 3.24  |
| H | -3.08 | 6.82  | -1.96 | C | -4.89 | -1.64 | -0.35 | H | -3.24 | 2.78  | 2.68  |
| H | -1.59 | 8.55  | -1.82 | C | -4.18 | -2.84 | -0.52 | H | -3.37 | 4.01  | 0.57  |

TS of CORC[10]CPP (Imaginary Frequency =  $124i \text{ cm}^{-1}$ )

|   |      |       |       |   |       |       |       |   |       |      |       |
|---|------|-------|-------|---|-------|-------|-------|---|-------|------|-------|
| C | 3.94 | 5.38  | 1.23  | C | 2.14  | -6.63 | -0.04 | C | -6.27 | 3.59 | 1.11  |
| C | 3.52 | 6.01  | 0.04  | C | 2.68  | -6.11 | -1.23 | C | -6.83 | 2.31 | 1.11  |
| C | 5.34 | 4.84  | -1.11 | C | -0.02 | -6.67 | 1.23  | C | -5.63 | 4.11 | -0.04 |
| C | 4.31 | 5.79  | -1.11 | C | 0.69  | -6.93 | 0.04  | C | -5.75 | 3.36 | -1.23 |
| C | 4.96 | 4.43  | 1.23  | C | -1.47 | -7.05 | -1.11 | C | -3.90 | 5.41 | 1.23  |
| C | 6.35 | 2.78  | -0.03 | C | -0.09 | -7.22 | -1.11 | C | -4.63 | 5.21 | 0.04  |
| C | 5.62 | 4.07  | 0.04  | C | -1.40 | -6.50 | 1.23  | C | -2.96 | 6.57 | -1.11 |
| C | 6.33 | 2.03  | -1.23 | C | -3.51 | -5.98 | -0.03 | C | -4.17 | 5.89 | -1.11 |
| C | 7.18 | 0.78  | 1.11  | C | -2.15 | -6.59 | 0.04  | C | -2.69 | 6.09 | 1.23  |
| C | 6.88 | 2.14  | 1.11  | C | -3.94 | -5.36 | -1.23 | C | -0.68 | 6.90 | -0.04 |
| C | 6.97 | -0.02 | -0.04 | C | -5.35 | -4.85 | 1.11  | C | -2.13 | 6.60 | 0.04  |
| C | 6.63 | 0.66  | -1.23 | C | -4.30 | -5.77 | 1.11  | C | 0.03  | 6.65 | -1.23 |
| C | 6.33 | -2.08 | 1.23  | C | -5.65 | -4.08 | -0.04 | C | 1.47  | 7.07 | 1.11  |
| C | 6.81 | -1.49 | 0.04  | C | -4.98 | -4.44 | -1.23 | C | 0.09  | 7.20 | 1.11  |
| C | 6.25 | -3.58 | -1.11 | C | -6.35 | -2.04 | 1.23  | C | 2.17  | 6.62 | -0.04 |
| C | 6.84 | -2.31 | -1.11 | C | -6.38 | -2.80 | 0.04  | C | 1.42  | 6.52 | -1.23 |
| C | 5.75 | -3.34 | 1.23  | C | -7.16 | -0.78 | -1.11 | H | 3.36  | 5.52 | 2.14  |
| C | 4.61 | -5.18 | -0.03 | C | -6.89 | -2.15 | -1.11 | H | 5.88  | 4.66 | -2.03 |
| C | 5.60 | -4.09 | 0.04  | C | -6.62 | -0.67 | 1.23  | H | 4.09  | 6.32 | -2.03 |
| C | 3.88 | -5.40 | -1.23 | C | -6.77 | 1.48  | -0.04 | H | 5.14  | 3.87 | 2.14  |
| C | 2.96 | -6.58 | 1.11  | C | -6.94 | 0.01  | 0.04  | H | 5.95  | 2.47 | -2.14 |
| C | 4.16 | -5.88 | 1.11  | C | -6.31 | 2.08  | -1.23 | H | 7.52  | 0.32 | 2.03  |

|   |       |       |       |   |       |       |       |   |       |       |       |
|---|-------|-------|-------|---|-------|-------|-------|---|-------|-------|-------|
| H | 7.00  | 2.70  | 2.03  | H | -6.25 | 1.50  | -2.14 | C | 1.88  | -1.74 | -0.01 |
| H | 6.47  | 0.10  | -2.14 | H | -6.28 | 4.16  | 2.03  | C | 0.88  | -0.81 | -0.01 |
| H | 6.29  | -1.49 | 2.14  | H | -7.26 | 1.93  | 2.03  | C | 1.04  | 0.58  | 0.00  |
| H | 6.25  | -4.15 | -2.03 | H | -5.28 | 3.72  | -2.14 | C | -0.23 | 1.17  | 0.00  |
| H | 7.28  | -1.94 | -2.03 | H | -4.22 | 4.91  | 2.14  | C | -1.18 | 0.14  | 0.00  |
| H | 5.27  | -3.69 | 2.14  | H | -2.62 | 7.03  | -2.03 | C | -2.55 | 0.30  | 0.00  |
| H | 4.19  | -4.90 | -2.14 | H | -4.74 | 5.84  | -2.03 | C | -3.22 | -1.00 | -0.01 |
| H | 2.63  | -7.05 | 2.03  | H | -2.10 | 6.09  | 2.14  | C | -2.53 | -2.23 | 0.00  |
| H | 4.74  | -5.82 | 2.03  | H | -0.51 | 6.42  | -2.14 | C | -1.07 | -2.33 | -0.01 |
| H | 2.10  | -6.12 | -2.14 | H | 2.02  | 7.25  | 2.03  | C | -0.50 | -1.08 | 0.00  |
| H | 0.52  | -6.44 | 2.14  | H | -0.41 | 7.49  | 2.03  | H | 0.70  | 4.38  | 0.01  |
| H | -2.02 | -7.23 | -2.03 | H | 1.90  | 6.18  | -2.14 | H | 2.88  | 3.37  | -0.01 |
| H | 0.40  | -7.52 | -2.03 | C | 0.74  | 3.29  | 0.00  | H | 4.38  | 0.69  | 0.00  |
| H | -1.88 | -6.16 | 2.14  | C | 2.02  | 2.70  | -0.01 | H | 4.10  | -1.69 | -0.02 |
| H | -3.36 | -5.49 | -2.14 | C | 2.24  | 1.25  | -0.01 | H | -2.32 | 3.78  | 0.00  |
| H | -5.90 | -4.68 | 2.03  | C | 3.36  | 0.31  | 0.00  | H | -3.95 | 2.02  | 0.02  |
| H | -4.07 | -6.30 | 2.04  | C | 3.19  | -1.09 | -0.01 | H | -0.34 | -4.42 | -0.02 |
| H | -5.17 | -3.88 | -2.14 | C | -0.50 | 2.51  | 0.00  | H | 2.01  | -3.95 | 0.00  |
| H | -5.97 | -2.49 | 2.14  | C | -1.94 | 2.76  | 0.00  | H | -4.31 | -1.04 | -0.01 |
| H | -7.50 | -0.32 | -2.03 | C | -2.90 | 1.72  | 0.01  | H | -3.14 | -3.13 | 0.01  |
| H | -7.03 | -2.71 | -2.03 | C | -0.05 | -3.37 | -0.01 |   |       |       |       |
| H | -6.44 | -0.11 | 2.14  | C | 1.34  | -3.10 | -0.01 |   |       |       |       |

TS of SUMC[10]CPP (Imaginary Frequency =  $127i \text{ cm}^{-1}$ )

|   |       |      |       |   |       |       |       |   |       |       |       |
|---|-------|------|-------|---|-------|-------|-------|---|-------|-------|-------|
| C | 6.73  | 1.67 | -1.22 | C | -5.06 | 5.25  | -0.92 | C | -2.98 | -5.64 | -1.36 |
| C | 7.15  | 1.03 | -0.03 | C | -3.95 | 6.10  | -0.90 | C | -1.13 | -6.76 | -0.14 |
| C | 6.62  | 3.10 | 1.16  | C | -5.35 | 4.40  | 0.17  | C | -2.55 | -6.34 | -0.21 |
| C | 7.19  | 1.83 | 1.14  | C | -4.58 | 4.57  | 1.33  | C | -0.41 | -6.64 | 1.07  |
| C | 6.17  | 2.95 | -1.19 | C | -6.22 | 2.48  | -1.17 | C | 1.02  | -6.94 | -1.30 |
| C | 4.99  | 4.72 | 0.12  | C | -6.20 | 3.20  | 0.05  | C | -0.37 | -7.02 | -1.31 |
| C | 6.00  | 3.64 | 0.02  | C | -7.19 | 1.24  | 1.13  | C | 1.72  | -6.58 | -0.12 |
| C | 4.19  | 4.79 | 1.28  | C | -6.79 | 2.57  | 1.17  | C | 0.98  | -6.54 | 1.08  |
| C | 3.44  | 6.29 | -0.93 | C | -6.61 | 1.14  | -1.20 | C | 3.48  | -5.28 | -1.31 |
| C | 4.62  | 5.54 | -0.96 | C | -6.95 | -1.02 | 0.01  | C | 3.09  | -6.03 | -0.18 |
| C | 2.57  | 6.25 | 0.18  | C | -7.02 | 0.46  | -0.03 | C | 5.07  | -5.16 | 0.96  |
| C | 3.01  | 5.53 | 1.31  | C | -6.51 | -1.67 | 1.18  | C | 3.96  | -6.00 | 0.94  |
| C | 0.43  | 6.60 | -1.08 | C | -6.53 | -3.10 | -1.20 | C | 4.59  | -4.44 | -1.29 |
| C | 1.16  | 6.70 | 0.12  | C | -7.05 | -1.81 | -1.16 | C | 6.30  | -3.15 | -0.02 |
| C | -0.96 | 6.97 | 1.31  | C | -5.91 | -3.68 | -0.07 | C | 5.38  | -4.31 | -0.13 |
| C | 0.43  | 6.99 | 1.30  | C | -6.01 | -2.96 | 1.14  | C | 6.41  | -2.44 | 1.19  |
| C | -0.97 | 6.60 | -1.07 | C | -4.16 | -4.89 | -1.34 | C | 7.32  | -1.24 | -1.14 |
| C | -3.08 | 6.14 | 0.21  | C | -4.95 | -4.80 | -0.18 | C | 6.87  | -2.55 | -1.17 |
| C | -1.69 | 6.66 | 0.14  | C | -3.42 | -6.38 | 0.89  | C | 7.21  | -0.45 | 0.02  |
| C | -3.47 | 5.41 | 1.35  | C | -4.60 | -5.63 | 0.91  | C | 6.85  | -1.12 | 1.21  |

|   |       |       |       |   |       |       |       |   |       |       |       |
|---|-------|-------|-------|---|-------|-------|-------|---|-------|-------|-------|
| H | 6.70  | 1.11  | -2.15 | H | -3.16 | -6.96 | 1.77  | C | 1.12  | -0.62 | 0.23  |
| H | 6.61  | 3.65  | 2.10  | H | -5.22 | -5.64 | 1.80  | C | 2.26  | -1.35 | 0.49  |
| H | 7.60  | 1.42  | 2.06  | H | -2.34 | -5.57 | -2.23 | C | 1.71  | -2.77 | 0.99  |
| H | 5.73  | 3.34  | -2.11 | H | -0.95 | -6.49 | 2.00  | C | -1.13 | -3.25 | 1.19  |
| H | 4.42  | 4.16  | 2.14  | H | 1.56  | -7.08 | -2.23 | C | 0.12  | -2.60 | 0.95  |
| H | 3.17  | 6.88  | -1.81 | H | -0.88 | -7.23 | -2.24 | C | 1.51  | 2.85  | -1.00 |
| H | 5.24  | 5.57  | -1.85 | H | 1.48  | -6.30 | 2.01  | C | -0.06 | 2.59  | -0.93 |
| H | 2.37  | 5.46  | 2.18  | H | 2.83  | -5.26 | -2.18 | C | -1.35 | 3.16  | -1.15 |
| H | 0.94  | 6.40  | -2.01 | H | 5.70  | -5.13 | 1.85  | C | -2.59 | 2.43  | -0.89 |
| H | -1.48 | 7.14  | 2.24  | H | 3.74  | -6.60 | 1.81  | C | -3.55 | -0.12 | 0.04  |
| H | 0.96  | 7.18  | 2.23  | H | 4.77  | -3.80 | -2.14 | C | -2.53 | -1.27 | 0.47  |
| H | -1.49 | 6.40  | -2.00 | H | 6.00  | -2.87 | 2.11  | H | 4.35  | 1.27  | -0.41 |
| H | -2.83 | 5.40  | 2.23  | H | 7.69  | -0.80 | -2.06 | H | 4.43  | -1.01 | 0.36  |
| H | -5.67 | 5.21  | -1.82 | H | 6.90  | -3.11 | -2.10 | H | -3.29 | -3.21 | 1.17  |
| H | -3.73 | 6.69  | -1.79 | H | 6.77  | -0.57 | 2.14  | H | 2.07  | -3.00 | 2.00  |
| H | -4.76 | 3.93  | 2.19  | C | 3.39  | 0.79  | -0.25 | H | 2.05  | -3.58 | 0.34  |
| H | -5.80 | 2.92  | -2.06 | C | 2.16  | 1.47  | -0.50 | H | -1.17 | -4.27 | 1.56  |
| H | -7.58 | 0.78  | 2.03  | C | 1.07  | 0.67  | -0.23 | H | 1.81  | 3.69  | -0.35 |
| H | -6.88 | 3.12  | 2.10  | C | -0.16 | 1.29  | -0.46 | H | 1.84  | 3.11  | -2.01 |
| H | -6.48 | 0.59  | -2.13 | C | -1.33 | 0.61  | -0.22 | H | -1.47 | 4.17  | -1.51 |
| H | -6.44 | -1.11 | 2.11  | C | -2.61 | 1.09  | -0.41 | H | -3.50 | 2.98  | -1.09 |
| H | -6.56 | -3.66 | -2.14 | C | 3.43  | -0.59 | 0.22  | H | -4.20 | -0.45 | -0.78 |
| H | -7.46 | -1.38 | -2.07 | C | -2.41 | -2.60 | 0.96  | H | -4.21 | 0.16  | 0.86  |
| H | -5.57 | -3.37 | 2.05  | C | -1.28 | -0.71 | 0.26  |   |       |       |       |
| H | -4.38 | -4.26 | -2.20 | C | -0.07 | -1.32 | 0.48  |   |       |       |       |

TS of CORC[11]CPP (Imaginary Frequency =  $113i$  cm<sup>-1</sup>)

|   |       |       |      |   |       |       |       |   |       |       |       |
|---|-------|-------|------|---|-------|-------|-------|---|-------|-------|-------|
| C | 4.84  | -6.39 | 0.82 | C | 6.23  | 3.83  | 1.33  | C | -7.57 | -1.56 | -0.01 |
| C | 3.61  | -7.04 | 0.81 | C | 8.14  | 1.52  | 1.16  | C | -6.42 | -4.16 | 0.10  |
| C | 0.63  | -7.27 | 1.16 | C | 7.13  | -2.61 | 1.18  | C | -6.48 | -3.45 | -1.11 |
| C | -3.42 | -5.99 | 1.40 | C | 8.33  | 0.14  | 1.12  | C | -7.72 | -0.09 | 0.02  |
| C | -0.75 | -7.27 | 1.29 | C | 6.45  | -3.82 | 1.13  | C | -7.99 | 0.67  | -1.13 |
| C | -4.61 | -5.27 | 1.39 | C | 5.21  | -5.51 | -0.21 | C | -7.04 | -2.18 | -1.17 |
| C | -7.10 | -3.62 | 1.21 | C | 4.34  | -5.40 | -1.32 | C | -7.17 | 2.70  | -0.05 |
| C | -7.33 | 0.61  | 1.18 | C | 2.68  | -6.81 | -0.23 | C | -7.72 | 2.04  | -1.17 |
| C | -7.67 | -2.35 | 1.16 | C | 3.10  | -6.03 | -1.32 | C | -4.47 | 6.02  | -0.16 |
| C | -7.06 | 1.97  | 1.15 | C | -1.59 | -7.16 | 0.16  | C | -6.48 | 4.00  | -0.16 |
| C | -6.31 | 4.86  | 0.95 | C | 1.25  | -7.18 | -0.11 | C | -5.74 | 4.29  | -1.33 |
| C | -2.45 | 6.63  | 1.16 | C | 0.41  | -7.25 | -1.24 | C | -3.18 | 6.72  | -0.04 |
| C | -5.33 | 5.85  | 0.95 | C | -3.01 | -6.74 | 0.28  | C | -2.52 | 7.28  | -1.16 |
| C | -1.09 | 6.92  | 1.20 | C | -3.92 | -6.86 | -0.79 | C | -4.76 | 5.28  | -1.32 |
| C | 1.87  | 7.45  | 1.16 | C | -0.98 | -7.22 | -1.11 | C | -0.40 | 7.32  | 0.04  |
| C | 5.28  | 4.85  | 1.34 | C | -5.43 | -5.25 | 0.25  | C | -1.16 | 7.57  | -1.12 |
| C | 3.20  | 7.03  | 1.19 | C | -5.11 | -6.13 | -0.81 | C | 3.80  | 6.41  | 0.08  |

|   |       |       |       |   |       |       |       |   |       |       |       |
|---|-------|-------|-------|---|-------|-------|-------|---|-------|-------|-------|
| C | 1.08  | 7.25  | 0.01  | H | 4.63  | 4.97  | 2.20  | C | 2.91  | -0.97 | -0.04 |
| C | 1.72  | 6.74  | -1.15 | H | 3.77  | 7.16  | 2.11  | C | 2.21  | 0.32  | -0.03 |
| C | 5.05  | 5.63  | 0.19  | H | 6.29  | 3.17  | 2.19  | C | 2.54  | 1.75  | 0.00  |
| C | 5.91  | 5.44  | -0.91 | H | 8.35  | 2.06  | 2.09  | C | 1.56  | 2.78  | 0.01  |
| C | 3.05  | 6.34  | -1.11 | H | 7.11  | -2.02 | 2.09  | C | 0.77  | -2.34 | -0.07 |
| C | 6.98  | 3.54  | 0.18  | H | 8.68  | -0.38 | 2.01  | C | -0.24 | -3.40 | -0.10 |
| C | 6.86  | 4.42  | -0.92 | H | 5.90  | -4.15 | 2.01  | C | -1.63 | -3.15 | -0.10 |
| C | 7.99  | -0.61 | -0.03 | H | 4.59  | -4.72 | -2.12 | C | -2.41 | 2.65  | -0.01 |
| C | 7.62  | 2.21  | 0.05  | H | 2.41  | -5.82 | -2.13 | C | -1.14 | 3.26  | 0.00  |
| C | 7.46  | 1.50  | -1.15 | H | 0.84  | -7.26 | -2.24 | C | 0.12  | 2.51  | -0.01 |
| C | 7.71  | -2.06 | 0.01  | H | -3.68 | -7.50 | -1.64 | C | -0.13 | 1.15  | -0.03 |
| C | 7.73  | -2.86 | -1.15 | H | -1.58 | -7.16 | -2.01 | C | 0.84  | 0.14  | -0.04 |
| C | 7.64  | 0.12  | -1.19 | H | -5.76 | -6.19 | -1.68 | C | 0.18  | -1.10 | -0.06 |
| C | 6.30  | -4.52 | -0.08 | H | -5.97 | -3.84 | -1.99 | C | -1.20 | -0.85 | -0.06 |
| C | 7.03  | -4.06 | -1.20 | H | -8.36 | 0.18  | -2.03 | C | -2.20 | -1.80 | -0.08 |
| H | 5.52  | -6.54 | 1.66  | H | -6.95 | -1.60 | -2.08 | C | -3.52 | -1.16 | -0.07 |
| H | 3.35  | -7.69 | 1.64  | H | -7.88 | 2.59  | -2.10 | C | -3.71 | 0.24  | -0.05 |
| H | 1.24  | -7.25 | 2.06  | H | -5.84 | 3.65  | -2.20 | C | -2.60 | 1.20  | -0.04 |
| H | -2.75 | -5.87 | 2.25  | H | -3.07 | 7.43  | -2.09 | C | -1.39 | 0.55  | -0.04 |
| H | -1.18 | -7.29 | 2.29  | H | -4.12 | 5.39  | -2.19 | H | 2.85  | -3.11 | -0.07 |
| H | -4.83 | -4.60 | 2.22  | H | -0.67 | 7.96  | -2.01 | H | 3.99  | -0.99 | -0.03 |
| H | -7.14 | -4.18 | 2.15  | H | 1.13  | 6.56  | -2.05 | H | 3.58  | 2.07  | 0.01  |
| H | -7.11 | 0.06  | 2.09  | H | 5.81  | 6.08  | -1.79 | H | 1.92  | 3.80  | 0.02  |
| H | -8.14 | -1.94 | 2.04  | H | 3.47  | 5.85  | -1.98 | H | 0.07  | -4.44 | -0.11 |
| H | -6.64 | 2.45  | 2.03  | H | 7.47  | 4.27  | -1.80 | H | -2.29 | -4.01 | -0.12 |
| H | -6.92 | 4.71  | 1.83  | H | 7.06  | 2.00  | -2.03 | H | -3.28 | 3.31  | -0.01 |
| H | -2.92 | 6.20  | 2.04  | H | 8.24  | -2.50 | -2.04 | H | -1.12 | 4.35  | 0.01  |
| H | -5.19 | 6.46  | 1.84  | H | 7.38  | -0.42 | -2.10 | H | -4.42 | -1.78 | -0.08 |
| H | -0.53 | 6.71  | 2.11  | H | 7.00  | -4.63 | -2.13 | H | -4.74 | 0.59  | -0.05 |
| H | 1.43  | 7.89  | 2.04  | C | 2.24  | -2.21 | -0.06 |   |       |       |       |

TS of SUMC[11]CPP (Imaginary Frequency =  $121i$  cm<sup>-1</sup>)

|   |       |       |      |   |       |       |       |   |       |       |       |
|---|-------|-------|------|---|-------|-------|-------|---|-------|-------|-------|
| C | 4.93  | -6.37 | 0.81 | C | -5.58 | 5.70  | 0.93  | C | 2.82  | -6.96 | -0.26 |
| C | 3.75  | -7.11 | 0.79 | C | -1.39 | 6.94  | 1.17  | C | 3.20  | -6.17 | -1.36 |
| C | 0.80  | -7.48 | 1.13 | C | 1.53  | 7.64  | 1.13  | C | -1.43 | -7.39 | 0.14  |
| C | -3.22 | -6.16 | 1.36 | C | 5.00  | 5.15  | 1.34  | C | 1.41  | -7.40 | -0.14 |
| C | -0.58 | -7.50 | 1.26 | C | 2.87  | 7.27  | 1.17  | C | 0.57  | -7.50 | -1.27 |
| C | -4.40 | -5.43 | 1.35 | C | 5.93  | 4.12  | 1.34  | C | -2.84 | -6.96 | 0.26  |
| C | -6.95 | -3.86 | 1.20 | C | 7.80  | 1.76  | 1.18  | C | -3.77 | -7.10 | -0.79 |
| C | -7.32 | 0.37  | 1.17 | C | 6.91  | -2.42 | 1.17  | C | -0.82 | -7.48 | -1.13 |
| C | -7.55 | -2.60 | 1.14 | C | 8.00  | 0.38  | 1.14  | C | -5.26 | -5.46 | 0.23  |
| C | -7.12 | 1.75  | 1.13 | C | 6.32  | -3.68 | 1.12  | C | -4.95 | -6.36 | -0.81 |
| C | -6.52 | 4.67  | 0.93 | C | 5.24  | -5.47 | -0.23 | C | -7.47 | -1.81 | -0.02 |
| C | -2.73 | 6.58  | 1.13 | C | 4.39  | -5.44 | -1.35 | C | -6.25 | -4.38 | 0.09  |



|   |       |       |       |   |       |       |       |   |       |       |       |
|---|-------|-------|-------|---|-------|-------|-------|---|-------|-------|-------|
| C | -6.32 | -3.66 | -1.12 | H | -6.98 | -4.42 | 2.13  | H | 7.06  | -0.19 | -2.08 |
| C | -7.68 | -0.35 | 0.01  | H | -7.06 | -0.17 | 2.08  | H | 6.97  | -4.44 | -2.13 |
| C | -7.99 | 0.40  | -1.14 | H | -8.05 | -2.21 | 2.03  | C | -0.74 | -3.49 | 0.01  |
| C | -6.91 | -2.40 | -1.17 | H | -6.71 | 2.24  | 2.01  | C | -1.50 | -2.28 | 0.02  |
| C | -7.27 | 2.47  | -0.07 | H | -7.12 | 4.49  | 1.82  | C | -0.69 | -1.16 | 0.01  |
| C | -7.79 | 1.78  | -1.18 | H | -3.17 | 6.10  | 2.01  | C | -1.39 | 0.05  | 0.02  |
| C | -4.74 | 5.91  | -0.17 | H | -5.47 | 6.31  | 1.83  | C | -0.70 | 1.24  | 0.01  |
| C | -6.65 | 3.80  | -0.18 | H | -0.81 | 6.75  | 2.07  | C | -1.26 | 2.50  | 0.02  |
| C | -5.92 | 4.13  | -1.34 | H | 1.07  | 8.07  | 2.02  | C | 0.72  | -3.49 | -0.01 |
| C | -3.47 | 6.67  | -0.06 | H | 4.37  | 5.29  | 2.21  | C | 2.69  | 2.43  | -0.04 |
| C | -2.86 | 7.28  | -1.17 | H | 3.44  | 7.42  | 2.09  | C | 0.70  | 1.24  | -0.01 |
| C | -4.99 | 5.16  | -1.34 | H | 6.00  | 3.47  | 2.21  | C | 1.39  | 0.05  | -0.02 |
| C | -0.73 | 7.41  | 0.02  | H | 8.00  | 2.30  | 2.10  | C | 0.69  | -1.17 | -0.01 |
| C | -1.51 | 7.65  | -1.13 | H | 6.83  | -1.84 | 2.09  | C | 1.49  | -2.29 | -0.02 |
| C | 3.49  | 6.66  | 0.06  | H | 8.35  | -0.13 | 2.03  | C | 2.98  | -1.69 | -0.04 |
| C | 0.75  | 7.41  | -0.02 | H | 5.79  | -4.05 | 1.99  | C | 3.42  | 1.17  | -0.04 |
| C | 1.40  | 6.94  | -1.17 | H | 4.59  | -4.75 | -2.17 | C | 2.76  | -0.10 | -0.04 |
| C | 4.75  | 5.90  | 0.17  | H | 2.51  | -6.02 | -2.19 | C | -2.99 | -1.68 | 0.04  |
| C | 5.60  | 5.68  | -0.93 | H | 0.99  | -7.51 | -2.26 | C | -2.76 | -0.09 | 0.04  |
| C | 2.74  | 6.57  | -1.13 | H | -3.55 | -7.76 | -1.62 | C | -3.42 | 1.18  | 0.04  |
| C | 6.66  | 3.79  | 0.18  | H | -1.43 | -7.44 | -2.03 | C | -2.68 | 2.44  | 0.03  |
| C | 6.53  | 4.65  | -0.93 | H | -5.62 | -6.45 | -1.66 | C | 0.01  | 3.49  | 0.00  |
| C | 7.68  | -0.36 | -0.01 | H | -5.80 | -4.04 | -1.99 | C | 1.27  | 2.50  | -0.02 |
| C | 7.28  | 2.45  | 0.07  | H | -8.35 | -0.11 | -2.03 | H | -1.21 | -4.46 | 0.02  |
| C | 7.12  | 1.73  | -1.13 | H | -6.83 | -1.82 | -2.09 | H | 1.20  | -4.47 | -0.02 |
| C | 7.46  | -1.83 | 0.02  | H | -8.00 | 2.32  | -2.10 | H | 3.31  | 3.33  | -0.04 |
| C | 7.55  | -2.62 | -1.14 | H | -6.00 | 3.48  | -2.21 | H | 3.53  | -2.01 | -0.93 |
| C | 7.32  | 0.35  | -1.17 | H | -3.42 | 7.43  | -2.09 | H | 3.56  | -2.02 | 0.83  |
| C | 6.24  | -4.39 | -0.09 | H | -4.36 | 5.30  | -2.21 | H | 4.51  | 1.24  | -0.05 |
| C | 6.94  | -3.87 | -1.20 | H | -1.05 | 8.08  | -2.02 | H | -3.57 | -2.01 | -0.83 |
| H | 5.61  | -6.46 | 1.66  | H | 0.83  | 6.74  | -2.07 | H | -3.54 | -2.00 | 0.93  |
| H | 3.53  | -7.77 | 1.62  | H | 5.48  | 6.30  | -1.83 | H | -4.50 | 1.26  | 0.05  |
| H | 1.41  | -7.44 | 2.03  | H | 3.19  | 6.09  | -2.01 | H | -3.29 | 3.34  | 0.04  |
| H | -2.53 | -6.01 | 2.19  | H | 7.13  | 4.48  | -1.82 | H | 0.02  | 4.14  | 0.88  |
| H | -1.01 | -7.51 | 2.26  | H | 6.72  | 2.23  | -2.01 | H | 0.00  | 4.14  | -0.88 |
| H | -4.61 | -4.74 | 2.17  | H | 8.04  | -2.23 | -2.03 |   |       |       |       |

TS of COR (Imaginary Frequency =  $122i \text{ cm}^{-1}$ )

|   |       |       |      |   |       |       |      |   |       |       |      |
|---|-------|-------|------|---|-------|-------|------|---|-------|-------|------|
| C | 0.86  | -3.27 | 0.00 | C | -2.47 | 0.68  | 0.00 | H | 1.40  | -4.21 | 0.00 |
| C | -0.55 | -3.33 | 0.00 | C | -1.15 | 0.32  | 0.00 | H | -1.00 | -4.32 | 0.00 |
| C | -1.41 | -2.14 | 0.00 | C | -0.66 | -1.00 | 0.00 | H | -3.57 | -2.63 | 0.00 |
| C | -2.84 | -1.83 | 0.00 | C | 0.75  | -0.93 | 0.00 | H | -4.42 | -0.38 | 0.00 |
| C | -3.34 | -0.50 | 0.00 | C | 1.12  | 0.42  | 0.00 | H | 3.80  | -2.29 | 0.00 |
| C | 1.60  | -2.00 | 0.00 | C | 2.40  | 0.91  | 0.00 | H | 4.44  | 0.03  | 0.00 |
| C | 3.00  | -1.55 | 0.00 | C | 2.40  | 2.37  | 0.00 | H | -1.73 | 4.09  | 0.00 |
| C | 3.37  | -0.19 | 0.00 | C | 1.23  | 3.15  | 0.00 | H | -3.61 | 2.59  | 0.00 |
| C | -1.51 | 3.02  | 0.00 | C | -0.12 | 2.56  | 0.00 | H | 3.35  | 2.91  | 0.00 |
| C | -2.61 | 2.14  | 0.00 | C | -0.06 | 1.19  | 0.00 | H | 1.34  | 4.23  | 0.00 |

TS of SUM (Imaginary Frequency =  $130i \text{ cm}^{-1}$ )

|   |       |       |      |   |       |       |      |   |       |       |       |
|---|-------|-------|------|---|-------|-------|------|---|-------|-------|-------|
| C | 2.45  | -2.64 | 0.00 | C | -0.08 | -2.76 | 0.00 | H | 1.30  | -4.48 | 0.00  |
| C | 2.48  | -1.21 | 0.00 | C | -1.66 | -3.02 | 0.00 | H | -4.53 | 1.11  | 0.00  |
| C | 1.21  | -0.68 | 0.00 | C | -3.51 | -0.80 | 0.00 | H | -1.97 | -3.59 | 0.88  |
| C | 1.18  | 0.73  | 0.00 | C | -2.29 | -1.54 | 0.00 | H | -1.97 | -3.59 | -0.88 |
| C | -0.02 | 1.39  | 0.00 | C | 3.44  | 0.07  | 0.00 | H | -4.48 | -1.30 | 0.00  |
| C | -0.19 | 2.76  | 0.00 | C | 2.43  | 1.32  | 0.00 | H | 4.09  | 0.08  | 0.88  |
| C | 1.20  | -3.39 | 0.00 | C | 2.34  | 2.73  | 0.00 | H | 4.09  | 0.08  | -0.88 |
| C | -3.54 | 0.66  | 0.00 | C | 1.06  | 3.44  | 0.00 | H | 3.23  | 3.36  | 0.00  |
| C | -1.22 | 0.66  | 0.00 | C | -1.78 | 2.94  | 0.00 | H | 1.11  | 4.53  | 0.00  |
| C | -1.19 | -0.71 | 0.00 | C | -2.35 | 1.45  | 0.00 | H | -2.12 | 3.50  | -0.88 |
| C | 0.04  | -1.39 | 0.00 | H | 3.36  | -3.23 | 0.00 | H | -2.12 | 3.50  | 0.88  |

Tetrazine

|   |       |       |      |   |       |       |      |   |       |      |      |
|---|-------|-------|------|---|-------|-------|------|---|-------|------|------|
| N | -1.68 | -0.21 | 0.00 | N | -2.36 | 0.93  | 0.00 | N | -0.31 | 2.17 | 0.00 |
| C | -0.34 | -0.11 | 0.00 | H | 0.22  | -1.04 | 0.00 | N | 0.38  | 1.03 | 0.00 |
| C | -1.65 | 2.07  | 0.00 | H | -2.21 | 3.00  | 0.00 |   |       |      |      |

TS of Tetrazine + COR (Imaginary Frequency =  $454i \text{ cm}^{-1}$ )

|   |       |       |       |   |       |       |       |   |       |       |       |
|---|-------|-------|-------|---|-------|-------|-------|---|-------|-------|-------|
| C | -1.69 | 2.90  | -0.13 | C | -0.44 | 1.27  | 1.11  | H | 1.38  | -3.90 | 0.18  |
| C | -2.74 | 1.99  | -0.28 | C | 0.75  | 0.54  | 1.35  | H | -1.02 | -4.10 | -0.23 |
| C | -2.63 | 0.62  | 0.17  | C | 2.00  | 1.01  | 0.98  | H | 3.93  | 0.26  | 0.29  |
| C | -3.35 | -0.55 | -0.30 | C | 3.07  | 0.00  | 0.91  | H | 3.38  | -2.06 | 0.28  |
| C | -2.83 | -1.83 | -0.17 | C | 2.71  | -1.43 | 0.87  | N | 3.13  | -0.13 | 3.58  |
| C | -0.44 | 2.52  | 0.48  | C | 1.31  | -1.85 | 0.95  | C | 4.06  | 0.25  | 2.60  |
| C | 0.87  | 3.10  | 0.28  | C | 0.41  | -0.87 | 1.34  | C | 3.54  | -2.17 | 2.67  |
| C | 2.03  | 2.37  | 0.51  | H | -1.79 | 3.88  | -0.58 | N | 2.85  | -1.38 | 3.60  |
| C | 0.73  | -3.07 | 0.46  | H | -3.62 | 2.29  | -0.84 | H | 4.29  | 1.31  | 2.56  |
| C | -0.64 | -3.19 | 0.22  | H | -4.27 | -0.41 | -0.86 | H | 3.27  | -3.21 | 2.63  |
| C | -1.54 | -2.08 | 0.44  | H | -3.36 | -2.66 | -0.64 | N | 4.88  | -1.86 | 2.47  |
| C | -0.98 | -0.98 | 1.09  | H | 0.95  | 4.09  | -0.17 | N | 5.17  | -0.60 | 2.45  |
| C | -1.51 | 0.34  | 0.95  | H | 2.99  | 2.82  | 0.25  |   |       |       |       |

TS of Tetrazine + CORC[10]CPP (Imaginary Frequency = 486i cm<sup>-1</sup>)

|   |       |       |       |   |       |       |       |   |       |       |       |
|---|-------|-------|-------|---|-------|-------|-------|---|-------|-------|-------|
| C | -6.56 | -1.85 | -1.36 | C | 0.07  | 6.52  | 0.98  | H | 4.89  | 5.68  | 1.50  |
| C | -6.97 | -1.24 | -0.16 | C | -1.45 | 7.25  | -1.23 | H | 1.92  | 6.01  | -2.45 |
| C | -6.51 | -3.35 | 0.98  | C | -0.06 | 7.35  | -1.28 | H | 0.65  | 6.17  | 1.83  |
| C | -7.03 | -2.06 | 0.99  | C | -2.11 | 6.71  | -0.11 | H | -2.03 | 7.55  | -2.10 |
| C | -6.04 | -3.14 | -1.37 | C | -1.32 | 6.43  | 1.03  | H | 0.42  | 7.72  | -2.18 |
| C | -4.94 | -5.00 | -0.12 | C | -3.93 | 5.56  | -1.37 | H | -1.78 | 6.00  | 1.91  |
| C | -5.91 | -3.89 | -0.18 | C | -3.48 | 6.16  | -0.17 | H | -3.37 | 5.70  | -2.29 |
| C | -4.11 | -5.11 | 1.01  | C | -5.31 | 5.05  | 0.99  | H | -5.85 | 4.87  | 1.92  |
| C | -3.42 | -6.50 | -1.29 | C | -4.26 | 5.96  | 0.98  | H | -4.00 | 6.48  | 1.91  |
| C | -4.61 | -5.78 | -1.25 | C | -4.98 | 4.64  | -1.36 | H | -5.21 | 4.10  | -2.27 |
| C | -2.50 | -6.47 | -0.22 | C | -6.36 | 3.01  | -0.07 | H | -5.66 | 2.62  | 1.94  |
| C | -2.92 | -5.84 | 0.97  | C | -5.63 | 4.29  | -0.16 | H | -7.81 | 0.63  | -2.05 |
| C | -0.44 | -6.51 | -1.61 | C | -6.18 | 2.21  | 1.08  | H | -7.23 | 3.01  | -2.05 |
| C | -1.07 | -6.81 | -0.38 | C | -7.34 | 1.06  | -1.17 | H | -6.23 | 0.26  | 1.94  |
| C | 1.14  | -7.06 | 0.61  | C | -7.02 | 2.42  | -1.17 | C | -1.71 | 2.92  | -0.20 |
| C | -0.24 | -7.17 | 0.70  | C | -7.03 | 0.23  | -0.07 | C | -2.75 | 2.01  | -0.33 |
| C | 0.94  | -6.40 | -1.69 | C | -6.51 | 0.86  | 1.08  | C | -2.64 | 0.64  | 0.12  |
| C | 3.14  | -6.05 | -0.58 | H | -6.51 | -1.26 | -2.28 | C | -3.37 | -0.53 | -0.34 |
| C | 1.77  | -6.59 | -0.57 | H | -6.52 | -3.93 | 1.90  | C | -2.85 | -1.82 | -0.22 |
| C | 3.68  | -5.45 | 0.57  | H | -7.42 | -1.66 | 1.92  | C | -0.44 | 2.53  | 0.40  |
| C | 4.91  | -4.97 | -1.87 | H | -5.61 | -3.53 | -2.29 | C | 0.87  | 3.10  | 0.18  |
| C | 3.86  | -5.87 | -1.79 | H | -4.33 | -4.52 | 1.90  | C | 2.04  | 2.38  | 0.43  |
| C | 5.31  | -4.21 | -0.75 | H | -3.16 | -7.05 | -2.20 | C | 0.72  | -3.05 | 0.40  |
| C | 4.74  | -4.55 | 0.49  | H | -5.26 | -5.78 | -2.12 | C | -0.65 | -3.16 | 0.15  |
| C | 5.77  | -2.12 | -2.01 | H | -2.25 | -5.79 | 1.82  | C | -1.55 | -2.06 | 0.38  |
| C | 6.05  | -2.93 | -0.89 | H | -1.04 | -6.23 | -2.47 | C | -0.98 | -0.96 | 1.02  |
| C | 7.13  | -1.01 | 0.16  | H | 1.75  | -7.30 | 1.49  | C | -1.51 | 0.36  | 0.88  |
| C | 6.80  | -2.37 | 0.16  | H | -0.69 | -7.48 | 1.64  | C | -0.44 | 1.29  | 1.03  |
| C | 6.10  | -0.76 | -2.00 | H | 1.38  | -6.04 | -2.62 | C | 0.75  | 0.55  | 1.28  |
| C | 6.64  | 1.31  | -0.74 | H | 3.18  | -5.59 | 1.53  | C | 2.00  | 1.03  | 0.92  |
| C | 6.71  | -0.16 | -0.88 | H | 5.39  | -4.80 | -2.83 | C | 3.08  | 0.01  | 0.93  |
| C | 6.30  | 1.87  | 0.50  | H | 3.54  | -6.40 | -2.69 | C | 2.71  | -1.42 | 0.87  |
| C | 6.11  | 3.45  | -1.78 | H | 5.05  | -4.01 | 1.39  | C | 1.31  | -1.84 | 0.89  |
| C | 6.63  | 2.16  | -1.86 | H | 5.19  | -2.51 | -2.83 | C | 0.41  | -0.85 | 1.27  |
| C | 5.56  | 3.94  | -0.57 | H | 7.65  | -0.60 | 1.02  | H | -1.81 | 3.90  | -0.63 |
| C | 5.76  | 3.15  | 0.59  | H | 7.07  | -2.98 | 1.02  | H | -3.65 | 2.32  | -0.86 |
| C | 3.76  | 5.25  | -1.68 | H | 5.76  | -0.14 | -2.83 | H | -4.31 | -0.40 | -0.87 |
| C | 4.58  | 5.05  | -0.55 | H | 6.32  | 1.24  | 1.39  | H | -3.39 | -2.64 | -0.67 |
| C | 3.06  | 6.48  | 0.72  | H | 6.07  | 4.07  | -2.67 | H | 0.96  | 4.09  | -0.27 |
| C | 4.25  | 5.75  | 0.63  | H | 6.98  | 1.80  | -2.83 | H | 2.99  | 2.82  | 0.16  |
| C | 2.58  | 5.98  | -1.59 | H | 5.38  | 3.50  | 1.54  | H | 1.37  | -3.88 | 0.12  |
| C | 0.73  | 6.90  | -0.20 | H | 3.98  | 4.73  | -2.61 | H | -1.02 | -4.08 | -0.31 |
| C | 2.16  | 6.54  | -0.37 | H | 2.81  | 6.96  | 1.66  | H | 3.97  | 0.26  | 0.36  |

|   |      |       |      |   |      |       |      |   |      |       |      |
|---|------|-------|------|---|------|-------|------|---|------|-------|------|
| H | 3.42 | -2.07 | 0.36 | C | 3.39 | -2.12 | 2.79 | H | 3.12 | -3.17 | 2.75 |
| N | 2.88 | -0.06 | 3.58 | N | 2.61 | -1.31 | 3.62 | N | 4.74 | -1.81 | 2.71 |
| C | 3.90 | 0.29  | 2.66 | H | 4.12 | 1.35  | 2.63 | N | 5.02 | -0.55 | 2.67 |

#### Cycloadduct of Tetrazine + COR

|   |       |       |       |   |       |       |       |   |       |       |       |
|---|-------|-------|-------|---|-------|-------|-------|---|-------|-------|-------|
| C | -1.79 | 2.94  | -0.29 | C | -0.56 | 1.32  | 0.98  | H | 1.22  | -3.89 | 0.25  |
| C | -2.83 | 2.04  | -0.47 | C | 0.61  | 0.59  | 1.29  | H | -1.16 | -4.07 | -0.27 |
| C | -2.73 | 0.67  | -0.01 | C | 1.86  | 1.07  | 0.98  | H | 3.68  | 0.26  | 0.18  |
| C | -3.46 | -0.50 | -0.47 | C | 3.00  | 0.06  | 1.02  | H | 3.13  | -1.96 | 0.18  |
| C | -2.96 | -1.79 | -0.30 | C | 2.62  | -1.48 | 1.02  | N | 3.05  | -0.12 | 3.47  |
| C | -0.54 | 2.57  | 0.36  | C | 1.14  | -1.83 | 0.98  | C | 3.88  | 0.29  | 2.31  |
| C | 0.76  | 3.14  | 0.20  | C | 0.26  | -0.83 | 1.29  | C | 3.30  | -2.08 | 2.31  |
| C | 1.92  | 2.41  | 0.49  | H | -1.87 | 3.93  | -0.75 | N | 2.75  | -1.33 | 3.47  |
| C | 0.57  | -3.05 | 0.48  | H | -3.70 | 2.35  | -1.05 | N | 4.74  | -1.83 | 2.20  |
| C | -0.80 | -3.15 | 0.19  | H | -4.37 | -0.37 | -1.05 | N | 5.05  | -0.62 | 2.20  |
| C | -1.68 | -2.04 | 0.35  | H | -3.49 | -2.62 | -0.75 | H | 4.21  | 1.32  | 2.42  |
| C | -1.12 | -0.92 | 0.98  | H | 0.87  | 4.13  | -0.26 | H | 3.10  | -3.15 | 2.42  |
| C | -1.63 | 0.39  | 0.80  | H | 2.89  | 2.85  | 0.25  |   |       |       |       |

#### Cycloadduct of Tetrazine + COR $\subset$ [10]CPP

|   |       |       |       |   |       |       |       |   |       |       |       |
|---|-------|-------|-------|---|-------|-------|-------|---|-------|-------|-------|
| C | -6.58 | -1.86 | -1.39 | C | 5.74  | -2.10 | -2.05 | C | -3.95 | 5.57  | -1.40 |
| C | -6.98 | -1.25 | -0.19 | C | 6.03  | -2.92 | -0.94 | C | -3.50 | 6.17  | -0.20 |
| C | -6.53 | -3.36 | 0.95  | C | 7.13  | -1.01 | 0.10  | C | -5.32 | 5.04  | 0.97  |
| C | -7.04 | -2.07 | 0.96  | C | 6.80  | -2.36 | 0.10  | C | -4.28 | 5.96  | 0.96  |
| C | -6.07 | -3.16 | -1.40 | C | 6.07  | -0.75 | -2.05 | C | -5.00 | 4.65  | -1.39 |
| C | -4.96 | -5.01 | -0.15 | C | 6.63  | 1.31  | -0.80 | C | -6.37 | 3.00  | -0.10 |
| C | -5.94 | -3.90 | -0.21 | C | 6.70  | -0.16 | -0.94 | C | -5.64 | 4.29  | -0.18 |
| C | -4.14 | -5.13 | 0.98  | C | 6.29  | 1.87  | 0.45  | C | -6.18 | 2.20  | 1.05  |
| C | -3.44 | -6.51 | -1.33 | C | 6.09  | 3.46  | -1.83 | C | -7.35 | 1.06  | -1.20 |
| C | -4.63 | -5.79 | -1.28 | C | 6.61  | 2.17  | -1.92 | C | -7.03 | 2.41  | -1.20 |
| C | -2.52 | -6.48 | -0.25 | C | 5.54  | 3.94  | -0.62 | C | -7.04 | 0.23  | -0.10 |
| C | -2.95 | -5.85 | 0.94  | C | 5.75  | 3.16  | 0.54  | C | -6.51 | 0.85  | 1.05  |
| C | -0.46 | -6.50 | -1.64 | C | 3.73  | 5.25  | -1.72 | H | -6.53 | -1.27 | -2.31 |
| C | -1.09 | -6.81 | -0.42 | C | 4.56  | 5.05  | -0.59 | H | -6.54 | -3.94 | 1.87  |
| C | 1.13  | -7.06 | 0.57  | C | 3.04  | 6.48  | 0.68  | H | -7.43 | -1.66 | 1.89  |
| C | -0.26 | -7.17 | 0.66  | C | 4.23  | 5.75  | 0.58  | H | -5.63 | -3.54 | -2.33 |
| C | 0.92  | -6.39 | -1.73 | C | 2.55  | 5.98  | -1.63 | H | -4.35 | -4.54 | 1.87  |
| C | 3.13  | -6.04 | -0.63 | C | 0.71  | 6.91  | -0.23 | H | -3.18 | -7.05 | -2.23 |
| C | 1.75  | -6.58 | -0.61 | C | 2.14  | 6.55  | -0.40 | H | -5.28 | -5.79 | -2.15 |
| C | 3.67  | -5.45 | 0.53  | C | 0.05  | 6.54  | 0.95  | H | -2.27 | -5.80 | 1.79  |
| C | 4.89  | -4.95 | -1.92 | C | -1.47 | 7.26  | -1.27 | H | -1.07 | -6.22 | -2.50 |
| C | 3.83  | -5.86 | -1.84 | C | -0.08 | 7.35  | -1.31 | H | 1.74  | -7.29 | 1.44  |
| C | 5.29  | -4.20 | -0.80 | C | -2.13 | 6.71  | -0.14 | H | -0.70 | -7.48 | 1.61  |
| C | 4.73  | -4.55 | 0.44  | C | -1.34 | 6.44  | 1.00  | H | 1.35  | -6.02 | -2.66 |

|   |       |       |       |   |       |       |       |   |       |       |       |
|---|-------|-------|-------|---|-------|-------|-------|---|-------|-------|-------|
| H | 3.18  | -5.59 | 1.49  | H | -4.02 | 6.48  | 1.88  | C | 3.08  | 0.08  | 1.17  |
| H | 5.36  | -4.78 | -2.89 | H | -5.23 | 4.11  | -2.30 | C | 2.71  | -1.47 | 1.17  |
| H | 3.51  | -6.38 | -2.74 | H | -5.66 | 2.61  | 1.91  | C | 1.24  | -1.84 | 1.04  |
| H | 5.04  | -4.01 | 1.34  | H | -7.82 | 0.62  | -2.08 | C | 0.34  | -0.84 | 1.34  |
| H | 5.15  | -2.50 | -2.87 | H | -7.24 | 3.01  | -2.08 | H | -1.84 | 3.90  | -0.68 |
| H | 7.66  | -0.60 | 0.95  | H | -6.23 | 0.25  | 1.91  | H | -3.66 | 2.31  | -0.96 |
| H | 7.08  | -2.98 | 0.95  | C | -1.74 | 2.91  | -0.24 | H | -4.31 | -0.42 | -0.96 |
| H | 5.72  | -0.13 | -2.87 | C | -2.78 | 2.00  | -0.40 | H | -3.40 | -2.66 | -0.69 |
| H | 6.32  | 1.25  | 1.34  | C | -2.67 | 0.63  | 0.05  | H | 0.92  | 4.10  | -0.25 |
| H | 6.04  | 4.07  | -2.72 | C | -3.38 | -0.55 | -0.41 | H | 2.94  | 2.85  | 0.28  |
| H | 6.96  | 1.81  | -2.88 | C | -2.87 | -1.83 | -0.25 | H | 1.34  | -3.88 | 0.28  |
| H | 5.38  | 3.50  | 1.50  | C | -0.49 | 2.55  | 0.39  | H | -1.03 | -4.08 | -0.26 |
| H | 3.95  | 4.72  | -2.64 | C | 0.82  | 3.12  | 0.22  | H | 3.82  | 0.27  | 0.39  |
| H | 2.79  | 6.96  | 1.62  | C | 1.98  | 2.40  | 0.53  | H | 3.29  | -1.97 | 0.39  |
| H | 4.88  | 5.69  | 1.45  | C | 0.68  | -3.05 | 0.52  | N | 2.88  | -0.05 | 3.62  |
| H | 1.89  | 6.01  | -2.48 | C | -0.68 | -3.17 | 0.21  | C | 3.83  | 0.33  | 2.54  |
| H | 0.63  | 6.19  | 1.80  | C | -1.59 | -2.07 | 0.39  | C | 3.26  | -2.04 | 2.54  |
| H | -2.05 | 7.56  | -2.14 | C | -1.04 | -0.95 | 1.02  | N | 2.59  | -1.26 | 3.62  |
| H | 0.39  | 7.72  | -2.22 | C | -1.56 | 0.36  | 0.85  | N | 4.70  | -1.77 | 2.59  |
| H | -1.80 | 6.02  | 1.88  | C | -0.50 | 1.30  | 1.03  | N | 4.99  | -0.55 | 2.59  |
| H | -3.39 | 5.71  | -2.32 | C | 0.68  | 0.58  | 1.34  | H | 4.12  | 1.37  | 2.66  |
| H | -5.86 | 4.86  | 1.89  | C | 1.93  | 1.07  | 1.05  | H | 3.06  | -3.10 | 2.66  |
